# Supplementary material
Source: PubMed Central journal article supplement (PMC7243168)
Supplement: NIHMS1584938-supplement-1.pdf [file NIHMS1584938-supplement-1.pdf]

**Cell Reports, Volume 31**

**Supplemental Information**

**Mouse Thermoregulation: Introducing  
the Concept of the Thermoneutral Point**

**Vojtěch Škop, Juen Guo, Naili Liu, Cuiying Xiao, Kevin D. Hall, Oksana Gavrilova, and Marc L. Reitman**

Table S1. Summary of experimental parameters. Key to abbreviations and parameters is on next page. Data are mean ± SEM. Related to Figures 1 - 4.

| Ta range of 16 - 34 °C                          | Control C57BL/6J<br>pooled from 4<br>experiments | Control C57BL/6J | RTX              | Control C57BL/6J | TKO              | Control C57BL/6J | ob/ob            | Control C57BL/6J | DIO              | 24h C57BL/6J<br>light | 24h C57BL/6J<br>dark |
|-------------------------------------------------|--------------------------------------------------|------------------|------------------|------------------|------------------|------------------|------------------|------------------|------------------|-----------------------|----------------------|
|                                                 | 1                                                | 2A               | 2A               | 2B               | 2B               | 2C               | 2C               | 2D               | 2D               | Abreu-Vieira 2015     | Abreu-Vieira 2015    |
| Figure reference                                | 1                                                | 2A               | 2A               | 2B               | 2B               | 2C               | 2C               | 2D               | 2D               | Abreu-Vieira 2015     | Abreu-Vieira 2015    |
| Phase                                           | Light                                            | Light            | Light            | Light            | Light            | Light            | Light            | Light            | Light            | Light                 | Dark                 |
| Ta setup protocol (Table S2)                    | 1                                                | 1                | 1                | 1                | 1                | 1                | 1                | 1                | 1                | -                     | -                    |
| n of mice                                       | 21                                               | 5                | 6                | 5                | 6                | 6                | 5                | 5                | 6                | 19                    | 19                   |
| n of data points in each regression             | 2320                                             | 325              | 390              | 575              | 690              | 690              | 575              | 650              | 741              | 8310                  | 8982                 |
| Body weight (g)                                 | 32.27 ± 0.97                                     | 38.02 ± 1.19     | 32.90 ± 0.48     | 30.92 ± 1.18     | 27.72 ± 0.95     | 32.77 ± 0.49     | 56.50 ± 2.02     | 30.58 ± 0.95     | 48.80 ± 0.74     | 26.92 ± 0.5           | 26.92 ± 0.5          |
| Age (wks)                                       | 15, 16, 39, 45                                   | 45               | 45               | 39               | 39               | 16               | 16               | 25               | 25               | 10 to 12              | 10 to 12             |
| Sex                                             | male                                             | male             | male             | male             | male             | male             | male             | male             | male             | male                  | male                 |
| Tl <sub>EE</sub> (°C)                           | 28.90 ± 0.15                                     | 28.87 ± 0.29     | 26.59 ± 0.48     | 28.57 ± 0.24     | 29.16 ± 0.25     | 27.11 ± 0.26     | 25.00 ± 0.34     | 28.58 ± 0.24     | 29.99 ± 0.20     | 29.03 ± 0.12          | 32.36 ± 0.17         |
| Tl <sub>cond</sub> (°C)                         | 28.78 ± 0.08                                     | 28.56 ± 0.23     | 25.77 ± 0.48     | 28.79 ± 0.18     | 28.83 ± 0.17     | 28.80 ± 0.14     | 27.04 ± 0.20     | 28.45 ± 0.13     | 29.21 ± 0.12     | 28.73 ± 0.17          | not defined          |
| Tb <sub>inc</sub> (°C)                          | 28.92 ± 0.11                                     | 27.58 ± 0.24     | not defined      | 28.75 ± 0.17     | 28.81 ± 0.18     | 28.99 ± 0.16     | 25.61 ± 0.19     | 29.22 ± 0.15     | 29.55 ± 0.13     | 27.49 ± 0.38          | not seen             |
| Tb <sub>inc</sub> - Tl <sub>EE</sub> (°C)       | 0.02                                             | -1.29            | -                | 0.18             | -0.35            | 1.88             | 0.61             | 0.64             | -0.44            | -1.53                 | -                    |
| TEE, at Tl <sub>EE</sub> (kcal/h)               | 0.246 ± 0.006                                    | 0.245 ± 0.013    | 0.330 ± 0.010    | 0.239 ± 0.010    | 0.227 ± 0.007    | 0.272 ± 0.005    | 0.388 ± 0.009    | 0.235 ± 0.006    | 0.280 ± 0.009    | 0.235 ± 0.006         | 0.265 ± 0.006        |
| Cond, <Tl <sub>cond</sub> (kcal/h/Δ°C)          | 0.0328 ± 0.0006                                  | 0.0349 ± 0.0014  | 0.0351 ± 0.0012  | 0.0315 ± 0.0019  | 0.0314 ± 0.0009  | 0.0339 ± 0.0007  | 0.0430 ± 0.0020  | 0.0319 ± 0.0008  | 0.0410 ± 0.0011  | 0.0310 ± 0.0006       | -                    |
| Tb, < Tb <sub>inc</sub> (°C)                    | 35.60 ± 0.07                                     | 35.44 ± 0.09     | varies           | 35.66 ± 0.12     | 35.70 ± 0.16     | 35.49 ± 0.09     | 33.91 ± 0.07     | 35.45 ± 0.06     | 35.87 ± 0.08     | 35.80 ± 0.11          | 36.89 ± 0.13         |
| defended Tb (°C)                                | 37.80 ± 0.36                                     | 36.77 ± 0.65     | 38.67 ± 1.32     | 37.12 ± 0.53     | 37.51 ± 0.47     | 35.39 ± 0.52     | 35.28 ± 1.13     | 36.83 ± 0.47     | 38.36 ± 0.37     | 38.26 ± 0.29          | 43.04 ± 0.32         |
| defended Tb - Tb, < Tb <sub>inc</sub> (°C)      | 2.20                                             | 1.33             | -                | 1.46             | 1.81             | -0.09            | 1.37             | 1.38             | 2.49             | 2.45                  | 6.15                 |
| TEE Slope, <Tl <sub>cond</sub> (kcal/h/°C)      | -0.0277 ± 0.0007                                 | -0.0310 ± 0.0011 | -0.0273 ± 0.0020 | -0.0279 ± 0.0008 | -0.0272 ± 0.0008 | -0.0328 ± 0.0012 | -0.0378 ± 0.0030 | -0.0285 ± 0.0008 | -0.0335 ± 0.0007 | -0.0255 ± 0.0004      | -0.0248 ± 0.0003     |
| Cond Slope, >Tl <sub>cond</sub> (kcal/h/Δ°C/°C) | 0.0070 ± 0.0005                                  | 0.0054 ± 0.0003  | 0.0032 ± 0.0002  | 0.0061 ± 0.0004  | 0.0056 ± 0.0003  | 0.0079 ± 0.0003  | 0.0072 ± 0.0003  | 0.0069 ± 0.0003  | 0.0077 ± 0.0003  | 0.0073 ± 0.0004       | -                    |
| Tb Slope, >Tb <sub>inc</sub> (°C Tb/°C)         | 0.337 ± 0.029                                    | 0.274 ± 0.015    | 0.488 ± 0.017    | 0.368 ± 0.021    | 0.319 ± 0.020    | 0.390 ± 0.019    | 0.557 ± 0.017    | 0.287 ± 0.016    | 0.333 ± 0.016    | 0.145 ± 0.014         | -                    |

| Ta range of 16 - 38 °C                                  | Control C57BL/6J<br>pooled from 3<br>experiments | Control C57BL/6J | C57BL/6J<br>30 °C acclimated | Control C57BL/6J | 129 male         | 129 male         | 129 female       | C57BL/6J dark<br>phase pooled<br>from 2 expts | Control C57BL/6J | Control C57BL/6J<br>home cages | Control C57BL/6J<br>Dark | Control C57BL/6J<br>home<br>cages, dark |
|---------------------------------------------------------|--------------------------------------------------|------------------|------------------------------|------------------|------------------|------------------|------------------|-----------------------------------------------|------------------|--------------------------------|--------------------------|-----------------------------------------|
|                                                         | 3D, 4B, S3                                       | 3A               | 3A                           | 3B               | 3B               | 3C               | 3C               | 3D, 4C                                        | 3E               | 3E                             | 3F                       | 3F                                      |
| Figure reference                                        | 3D, 4B, S3                                       | 3A               | 3A                           | 3B               | 3B               | 3C               | 3C               | 3D, 4C                                        | 3E               | 3E                             | 3F                       | 3F                                      |
| Phase                                                   | Light                                            | Light            | Light                        | Light            | Light            | Light            | Light            | Dark                                          | Light            | Light                          | Dark                     | Dark                                    |
| Ta setup protocol (Table S2)                            | 2                                                | 2                | 3                            | 2                | 2                | 2                | 2                | 4                                             | 2                | 2                              | 4                        | 4                                       |
| n of mice                                               | 15                                               | 5                | 5                            | 5                | 6                | 7                | 4                | 17                                            | 6                | 11                             | 6                        | 11                                      |
| n of data points in each regression                     | 2175                                             | 585              | 725                          | 705              | 846              | 1001             | 572              | 2636                                          | 809              | 4213                           | 881                      | 4114                                    |
| Body weight (g)                                         | 30.13 ± 0.53                                     | 29.78 ± 1.37     | 31.32 ± 1.44                 | 30.02 ± 0.33     | 31.82 ± 1.16     | 27.14 ± 0.60     | 21.05 ± 0.50     | 33.42 ± 1.02                                  | 28.62 ± 0.71     | 31.18 ± 0.62                   | 28.35 ± 0.75             | 32.08 ± 0.71                            |
| Age (wks)                                               | 25, 27, 33                                       | 33               | 28                           | 27               | 26               | 14               | 14               | 10, 46                                        | 12               | 15                             | 10                       | 18                                      |
| Sex                                                     | male                                             | male             | male                         | male             | male             | male             | female           | male                                          | male             | male                           | male                     | male                                    |
| Tl <sub>EE</sub> (°C)                                   | 28.83 ± 0.12                                     | 28.92 ± 0.19     | 28.60 ± 0.01                 | 28.77 ± 0.23     | 29.29 ± 0.22     | 28.80 ± 0.20     | 29.90 ± 0.20     | same as TEE_R                                 | 30.44 ± 0.25     | 30.92 ± 0.12                   | same as TEE_R            | same as TEE_R                           |
| Tl <sub>cond</sub> (°C)                                 | 28.30 ± 0.10                                     | 28.70 ± 0.21     | 28.19 ± 0.22                 | 28.75 ± 0.16     | 29.16 ± 0.15     | 29.16 ± 0.14     | 28.89 ± 0.38     | not defined                                   | 27.36 ± 0.41     | 27.58 ± 0.14                   | not defined              | not defined                             |
| Tb <sub>inc</sub> (°C)                                  | 28.76 ± 0.13                                     | 28.74 ± 0.33     | 27.69 ± 0.19                 | 27.23 ± 0.33     | 29.35 ± 0.18     | 30.43 ± 0.01     | 30.11 ± 0.04     | same as Tb_R                                  | 28.19 ± 0.02     | 27.77 ± 0.45                   | same as Tb_R             | same as Tb_R                            |
| Tb <sub>inc</sub> - Tl <sub>EE</sub> (°C)               | -0.07                                            | -0.18            | -0.91                        | -1.54            | 0.06             | 1.63             | 0.21             | -1.17                                         | -2.25            | -3.15                          | -1.22                    | -0.09                                   |
| TEE, at Tl <sub>EE</sub> (kcal/h)                       | 0.234 ± 0.004                                    | 0.221 ± 0.004    | 0.230 ± 0.008                | 0.246 ± 0.007    | 0.253 ± 0.006    | 0.181 ± 0.006    | 0.185 ± 0.008    | 0.286 ± 0.008                                 | 0.226 ± 0.005    | 0.226 ± 0.007                  | 0.257 ± 0.010            | 0.267 ± 0.007                           |
| Cond, <Tl <sub>cond</sub> (kcal/h/Δ°C)                  | 0.0326 ± 0.0004                                  | 0.0335 ± 0.0012  | 0.0310 ± 0.0022              | 0.0327 ± 0.0016  | 0.0350 ± 0.0014  | 0.0232 ± 0.0012  | 0.0273 ± 0.0011  | -                                             | 0.0335 ± 0.0027  | 0.0340 ± 0.0020                | -                        | -                                       |
| Tb, < Tb <sub>inc</sub> (°C)                            | 35.40 ± 0.06                                     | 35.27 ± 0.08     | 35.15 ± 0.08                 | 35.46 ± 0.10     | 35.83 ± 0.10     | 36.09 ± 0.12     | 36.31 ± 0.17     | 36.52 ± 0.06                                  | 35.35 ± 0.10     | 35.31 ± 0.06                   | 36.51 ± 0.14             | 36.35 ± 0.06                            |
| defended Tb (°C)                                        | 37.21 ± 0.34                                     | 36.20 ± 0.47     | 37.86 ± 0.41                 | 38.11 ± 0.49     | 37.81 ± 0.43     | 37.62 ± 0.47     | 37.23 ± 0.43     | 45.40 ± 0.39                                  | 39.50 ± 0.42     | 39.76 ± 0.31                   | 44.72 ± 0.51             | 44.50 ± 0.34                            |
| defended Tb - Tb, < Tb <sub>inc</sub> (°C)              | 1.81                                             | 0.93             | 2.95                         | 2.65             | 1.97             | 1.53             | 0.92             | 8.88                                          | 4.15             | 4.44                           | 8.21                     | 8.15                                    |
| TEE Slope, <Tl <sub>cond</sub> (kcal/h/°C)              | -0.0279 ± 0.0008                                 | -0.0304 ± 0.0013 | -0.0248 ± 0.0006             | -0.0264 ± 0.0008 | -0.0297 ± 0.0008 | -0.0205 ± 0.0005 | -0.0252 ± 0.0006 | -0.0249 ± 0.0004                              | -0.0250 ± 0.0006 | -0.0256 ± 0.0003               | -0.0246 ± 0.0005         | -0.0248 ± 0.0003                        |
| Cond Slope, >Tl <sub>cond</sub> <Cond_R (kcal/h/Δ°C/°C) | 0.0063 ± 0.0004                                  | 0.0063 ± 0.0004  | 0.0061 ± 0.0003              | 0.0086 ± 0.0004  | 0.0074 ± 0.0003  | 0.0057 ± 0.0002  | 0.0039 ± 0.0006  | -                                             | 0.0048 ± 0.0006  | 0.0069 ± 0.0003                | -                        | -                                       |
| Tb Slope, >Tb <sub>inc</sub> <Tb_R (°C Tb/°C)           | 0.237 ± 0.025                                    | 0.256 ± 0.030    | 0.272 ± 0.021                | 0.154 ± 0.013    | 0.300 ± 0.024    | 0.335 ± 0.017    | 0.265 ± 0.026    | -                                             | 0.130 ± 0.010    | 0.068 ± 0.008                  | -                        | -                                       |
| TEE_R (°C)                                              | 33.91 ± 0.29                                     | 33.78 ± 0.37     | 35.24 ± 0.39                 | 34.38 ± 0.84     | 33.33 ± 0.04     | not seen         | not seen         | 33.94 ± 0.14                                  | 33.65 ± 0.85     | 34.50 ± 0.20                   | 34.28 ± 0.22             | 33.74 ± 0.12                            |
| Cond_R (°C)                                             | 32.95 ± 0.10                                     | 33.47 ± 0.24     | 35.83 ± 0.11                 | 33.51 ± 0.02     | not seen         | not seen         | 32.80 ± 0.42     | not defined                                   | 31.94 ± 0.17     | 32.43 ± 0.08                   | not defined              | not defined                             |
| Tb_R (°C)                                               | 33.15 ± 0.08                                     | 32.85 ± 0.16     | 33.31 ± 0.15                 | 33.26 ± 0.11     | 33.19 ± 0.13     | 33.15 ± 0.14     | 32.88 ± 0.02     | 32.77 ± 0.13                                  | 33.44 ± 0.12     | 33.36 ± 0.05                   | 33.06 ± 0.35             | 33.65 ± 0.04                            |
| TEE Slope, >TEE_R (kcal/h/°C)                           | 0.0158 ± 0.0041                                  | 0.0275 ± 0.0058  | 0.0181 ± 0.0037              | 0.0112 ± 0.0071  | 0.0125 ± 0.0028  | -                | -                | 0.0215 ± 0.0032                               | 0.0125 ± 0.0044  | 0.0212 ± 0.0016                | 0.0252 ± 0.0065          | 0.0143 ± 0.0017                         |
| Cond Slope, >Cond_R (kcal/h/Δ°C/°C)                     | 0.0134 ± 0.0011                                  | 0.0131 ± 0.0007  | 0.0296 ± 0.0014              | 0.0125 ± 0.0006  | -                | -                | 0.0081 ± 0.0006  | -                                             | 0.0190 ± 0.0005  | 0.0214 ± 0.0002                | -                        | -                                       |
| Tb Slope, >Tb_R (°C Tb/°C)                              | 0.780 ± 0.035                                    | 0.841 ± 0.033    | 0.728 ± 0.049                | 0.800 ± 0.029    | 0.891 ± 0.027    | 0.805 ± 0.025    | 0.576 ± 0.033    | 0.620 ± 0.030                                 | 0.784 ± 0.028    | 0.841 ± 0.010                  | 0.558 ± 0.083            | 0.800 ± 0.011                           |

**Table S1 continued: Key to abbreviations and parameters**

|                                                                |                                                                                                         |
|----------------------------------------------------------------|---------------------------------------------------------------------------------------------------------|
| <b>DIO</b>                                                     | diet induced obese                                                                                      |
| <b>ob/ob</b>                                                   | leptin-deficient                                                                                        |
| <b>RTX</b>                                                     | neonatal treatment with resiniferatoxin                                                                 |
| <b>TKO</b>                                                     | <i>Trpv1</i> <sup>-/-</sup> ; <i>Trpm8</i> <sup>-/-</sup> ; <i>Trpa1</i> <sup>-/-</sup> triple knockout |
|                                                                |                                                                                                         |
| <b>Tlc<sub>EE</sub></b>                                        | lower critical temperature, the (first) breakpoint of the TEE vs Ta graph                               |
| <b>Tlc<sub>cond</sub></b>                                      | lower critical temperature, the (first) breakpoint of the conductance vs Ta graph                       |
| <b>Tb<sub>inc</sub></b>                                        | Ta above which the Tb first increases                                                                   |
| <b>Tb<sub>inc</sub> - Tlc<sub>EE</sub></b>                     | difference between the Tb <sub>inc</sub> and Tlc <sub>EE</sub>                                          |
| <b>TEE at Tlc<sub>EE</sub></b>                                 | mean TEE at Ta = Tlc <sub>EE</sub>                                                                      |
| <b>Cond, &lt;Tlc</b>                                           | mean conductance at Ta < Tlc <sub>cond</sub>                                                            |
| <b>Tb, &lt;Tb<sub>inc</sub></b>                                | mean Tb at Ta < Tb <sub>inc</sub>                                                                       |
| <b>defended Tb</b>                                             | X intercept of TEE vs Ta line (using only Ta < Tlc <sub>EE</sub> )                                      |
| <b>defended Tb - Tb, &lt;Tb<sub>inc</sub></b>                  | defended Tb minus the measured Tb < Tb <sub>inc</sub>                                                   |
| <b>TEE Slope, &lt;Tlc<sub>EE</sub></b>                         | TEE vs Ta slope for Ta < Tlc <sub>EE</sub>                                                              |
| <b>Cond Slope, &gt;Tlc<sub>cond</sub> &lt;Cond<sub>R</sub></b> | conductance slope in the region > Tlc <sub>cond</sub> and < Cond <sub>R</sub>                           |
| <b>Tb Slope, &gt;Tb<sub>inc</sub> &lt;Tb<sub>R</sub></b>       | Tb slope in the region > Tb <sub>inc</sub> and < Tb <sub>R</sub>                                        |
| <b>TEE<sub>R</sub></b>                                         | breakpoint of the TEE vs Ta graph, where TEE starts to rise with Ta                                     |
| <b>Cond<sub>R</sub></b>                                        | second breakpoint of the conductance vs Ta graph                                                        |
| <b>Tb<sub>R</sub></b>                                          | breakpoint of the Tb vs Ta graph, where Tb starts to steeply rise with Ta                               |
| <b>TEE Slope, &gt;TEE<sub>R</sub></b>                          | TEE vs Ta slope for Ta > TEE <sub>R</sub>                                                               |
| <b>Cond Slope, &gt;Cond<sub>R</sub></b>                        | conductance vs Ta slope for Ta > Cond <sub>R</sub>                                                      |
| <b>Tb Slope, &gt;Tb<sub>R</sub></b>                            | Tb vs Ta slope for Ta > Tb <sub>R</sub>                                                                 |

**Table S2. Ta setup protocols. Related to STAR methods.**

Experimental outline showing Ta changes setup in calorimetry systems used for data acquisition. Data from gray-shaded areas were used for regression analysis.

|                                                   |       | Day time (h) | 16 - 8          | 8 - 9 | 9 - 10          | 10 - 11 | 11 - 12         | 12 - 13 | 13 - 14         | 14 - 15 | 15 - 16                  |       |       |                         |
|---------------------------------------------------|-------|--------------|-----------------|-------|-----------------|---------|-----------------|---------|-----------------|---------|--------------------------|-------|-------|-------------------------|
| <b>Protocol number 1</b><br>Ta range 16 - 34 °C   | Day 1 | 22 °C        | 22 °C           | 22 °C | 19 °C           | 19 °C   | 19 °C           | 16 °C   | 16 °C           | 16 °C   | change to 25 °C at 16:00 |       |       |                         |
|                                                   | Day 2 | 25 °C        | 25 °C           | 25 °C | 27 °C           | 27 °C   | 28 °C           | 28 °C   | 29 °C           | 29 °C   |                          |       |       |                         |
|                                                   | Day 3 | 25 °C        | 30 °C           | 30 °C | 30 °C           | 30 °C   | 31 °C           | 31 °C   | 32 °C           | 32 °C   |                          |       |       |                         |
|                                                   | Day 4 | 25 °C        | 33 °C           | 33 °C | 33 °C           | 33 °C   | 34 °C           | 34 °C   | 35 °C           | 35 °C   |                          |       |       |                         |
|                                                   |       |              | change at 8:00  |       | change at 10:00 |         | change at 12:00 |         | change at 14:00 |         |                          |       |       |                         |
| <b>Protocol number 2</b><br>Ta range 16 - 38 °C   | Day 1 | 22 °C        | 22 °C           | 22 °C | 19 °C           | 19 °C   | 19 °C           | 16 °C   | 16 °C           | 16 °C   | change to 25 °C at 16:00 |       |       |                         |
|                                                   | Day 2 | 25 °C        | 25 °C           | 25 °C | 27 °C           | 27 °C   | 28 °C           | 28 °C   | 29 °C           | 29 °C   |                          |       |       |                         |
|                                                   | Day 3 | 25 °C        | 30 °C           | 30 °C | 30 °C           | 30 °C   | 31 °C           | 31 °C   | 32 °C           | 32 °C   |                          |       |       |                         |
|                                                   | Day 4 | 25 °C        | 33 °C           | 33 °C | 33 °C           | 33 °C   | 34 °C           | 34 °C   | 35 °C           | 35 °C   |                          |       |       |                         |
|                                                   | Day 5 | 25 °C        | 36 °C           | 36 °C | 36 °C           | 36 °C   | 37 °C           | 37 °C   | 38 °C           | 38 °C   |                          |       |       |                         |
|                                                   |       |              | change at 8:00  |       | change at 10:00 |         | change at 12:00 |         | change at 14:00 |         |                          |       |       |                         |
| <b>Protocol number 3</b><br>30 °C acclimated mice | Day 1 | 30 °C        | 30 °C           | 30 °C | 31 °C           | 31 °C   | 32 °C           | 32 °C   | 33 °C           | 33 °C   | change to 30 °C at 16:00 |       |       |                         |
|                                                   | Day 2 | 30 °C        | 34 °C           | 34 °C | 34 °C           | 34 °C   | 35 °C           | 35 °C   | 36 °C           | 36 °C   |                          |       |       |                         |
|                                                   | Day 3 | 30 °C        | 37 °C           | 37 °C | 37 °C           | 37 °C   | 38 °C           | 38 °C   | 40 °C           | 40 °C   |                          |       |       |                         |
|                                                   | Day 4 | 30 °C        | 29 °C           | 29 °C | 28 °C           | 28 °C   | 27 °C           | 27 °C   | 25 °C           | 25 °C   |                          |       |       |                         |
|                                                   | Day 5 | 30 °C        | 22 °C           | 22 °C | 22 °C           | 22 °C   | 19 °C           | 19 °C   | 19 °C           | 19 °C   |                          |       |       |                         |
|                                                   |       |              | change at 8:00  |       | change at 10:00 |         | change at 12:00 |         | change at 14:00 |         |                          |       |       |                         |
| <b>Protocol number 4</b><br>Dark phase            | Day 1 | 04 - 18      | 22 °C           | 22 °C | 22 °C           | 22 °C   | 22 °C           | 19 °C   | 19 °C           | 19 °C   | 16 °C                    | 16 °C | 16 °C | change to 25 °C at 4:00 |
|                                                   | Day 2 | 18 - 19      | 25 °C           | 25 °C | 25 °C           | 27 °C   | 27 °C           | 28 °C   | 28 °C           | 29 °C   | 29 °C                    | 30 °C | 30 °C |                         |
|                                                   | Day 3 | 19 - 20      | 25 °C           | 31 °C | 31 °C           | 31 °C   | 31 °C           | 32 °C   | 32 °C           | 33 °C   | 33 °C                    | 34 °C | 34 °C |                         |
|                                                   | Day 4 | 20 - 21      | 25 °C           | 35 °C | 35 °C           | 35 °C   | 35 °C           | 36 °C   | 36 °C           | 37 °C   | 37 °C                    | 38 °C | 38 °C |                         |
|                                                   |       |              | change at 18:00 |       | change at 20:00 |         | change at 22:00 |         | change at 00:00 |         | change at 2:00           |       |       |                         |

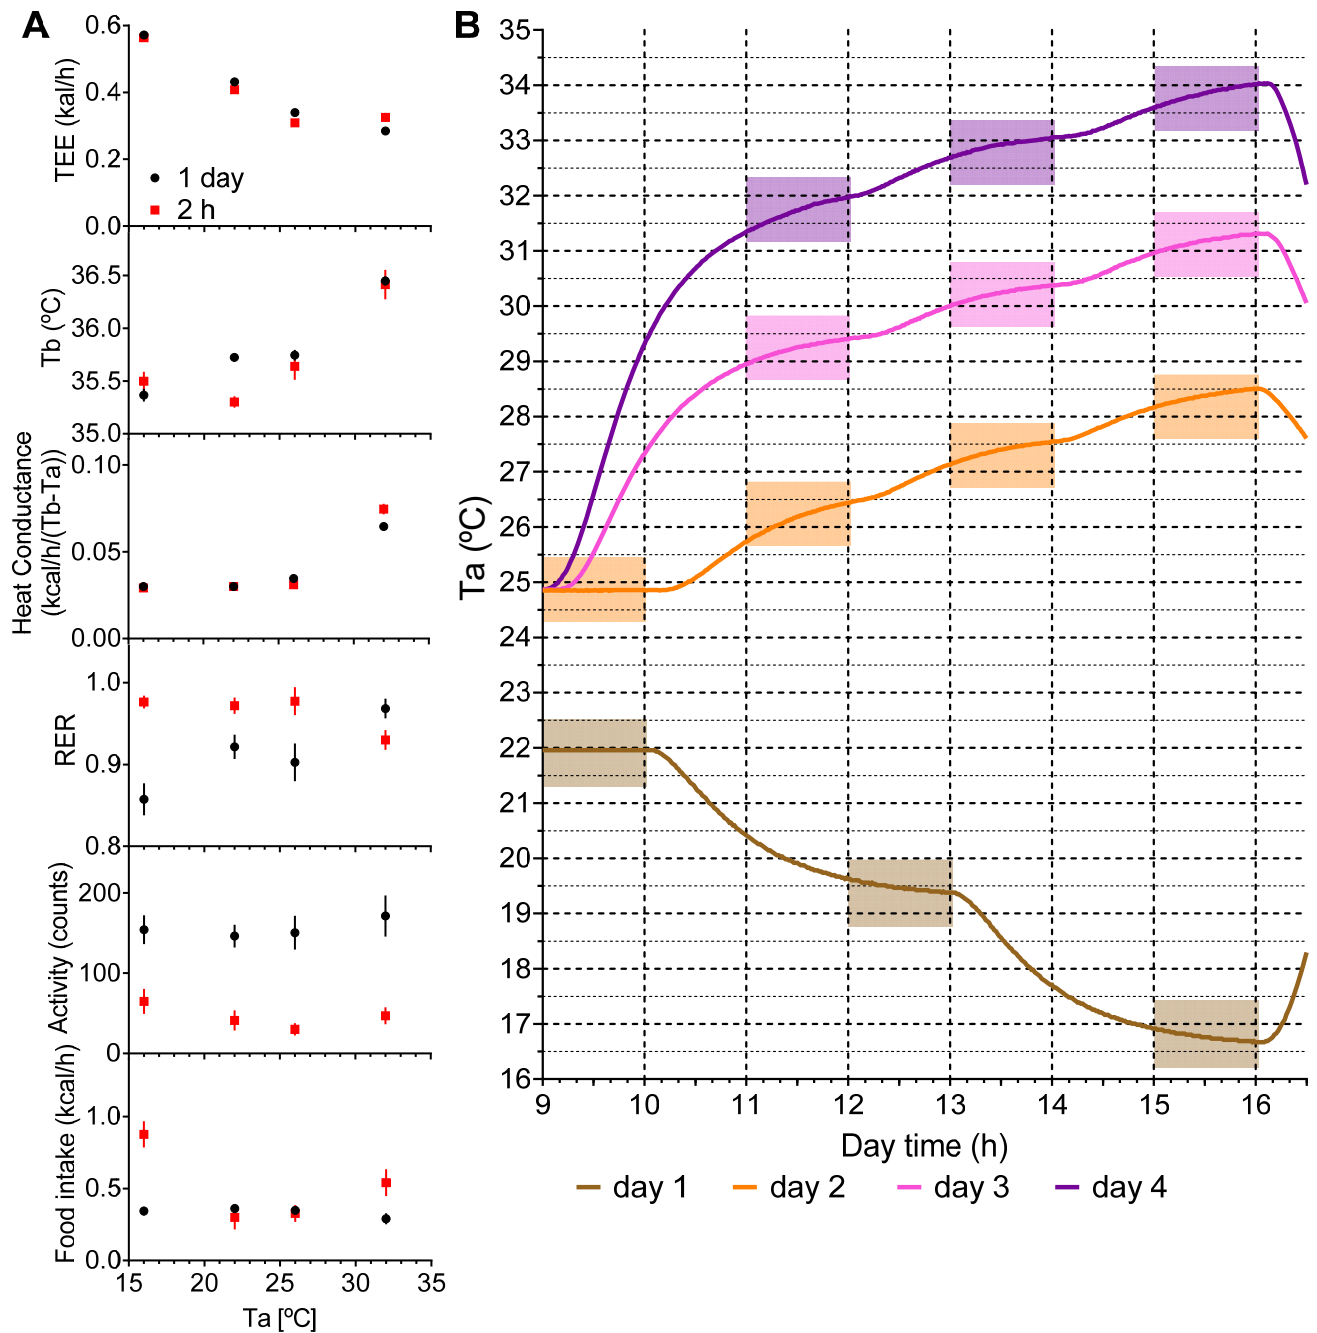

**Figure S1.** Measuring thermal biology parameters. Related to Figures 1 – 3 and STAR methods. (A) TEE, Tb, heat conductance, RER, activity, and food intake in mice using 65-min intervals (red squares) and the same mice housed 24 h (black circles) at the indicated Ta. In the 24 h dataset, only light phase data from 1 h after lights on to 1 h before lights off were used. Data are mean  $\pm$  SEM,  $n = 11$ . (B) Experimental outline showing environmental chamber Ta (showing Ta setup protocol 1 from Table S2). Shaded areas are the 65-min intervals used for the points in Figures 1, 2, 3, and S3. Regression analyses used all data from days 1, 2 (0900 – 1600) and days 3, 4 (1100 – 1600).

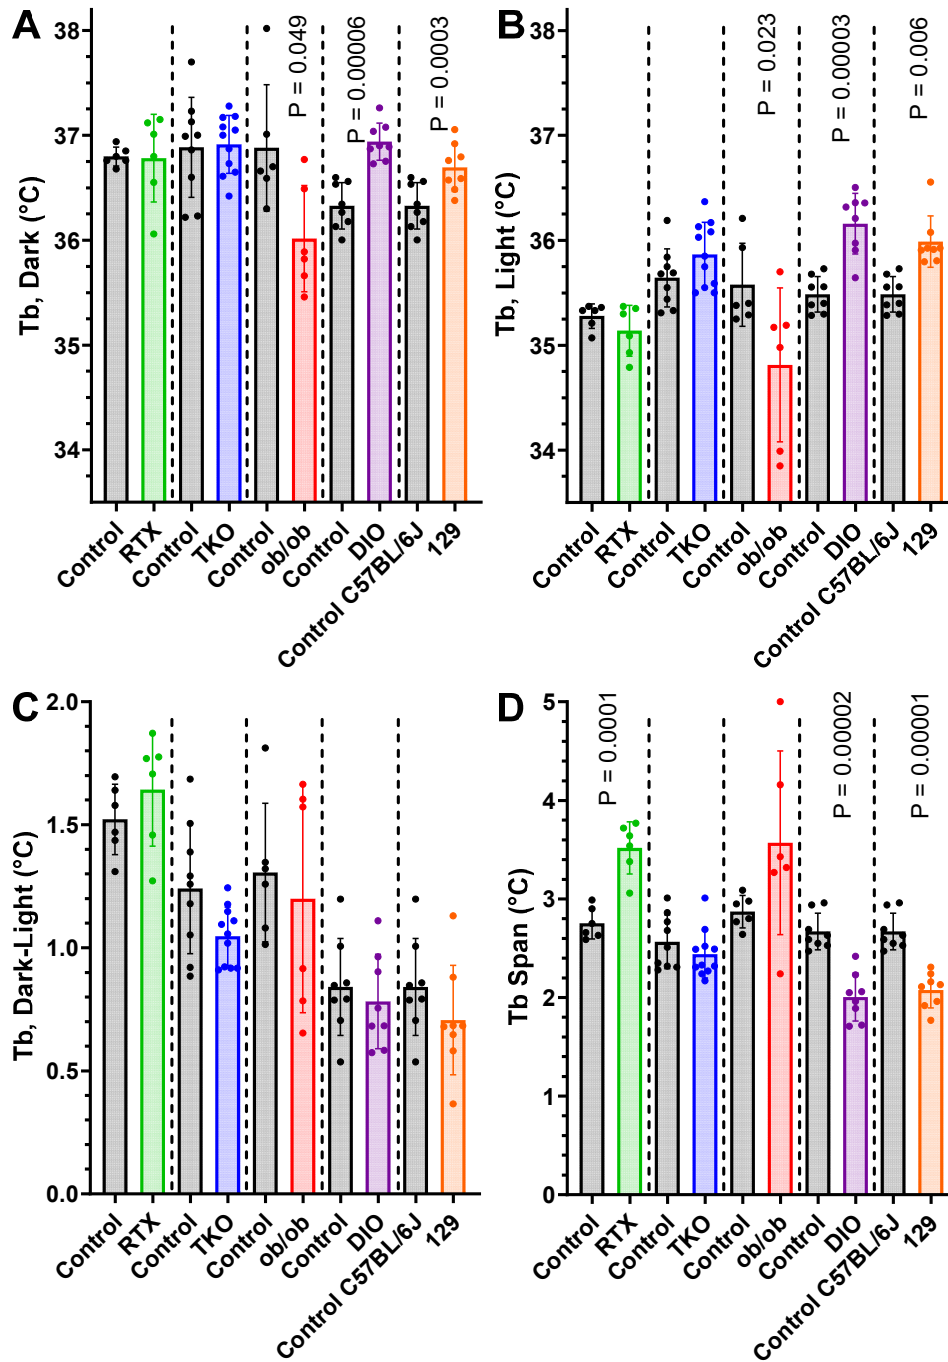

**Figure S2.** Baseline body temperature (Tb). Related to Figures 2, 3. Tb was measured continuously at an ambient temperature (Ta) of 22 °C by telemetry in singly-housed mice in their home cages for 72 consecutive hours. (A) Dark phase Tb. (B) Light phase Tb. (C) Difference between dark and light phase Tb. (D) Tb span, the difference between 5<sup>th</sup> and 95<sup>th</sup> percentiles of the full dataset. Experiments done at different times are separated by dashed lines. Data are mean  $\pm$ SD,  $n=6-11$ /group,  $P$  values are t-test vs controls studied simultaneously.

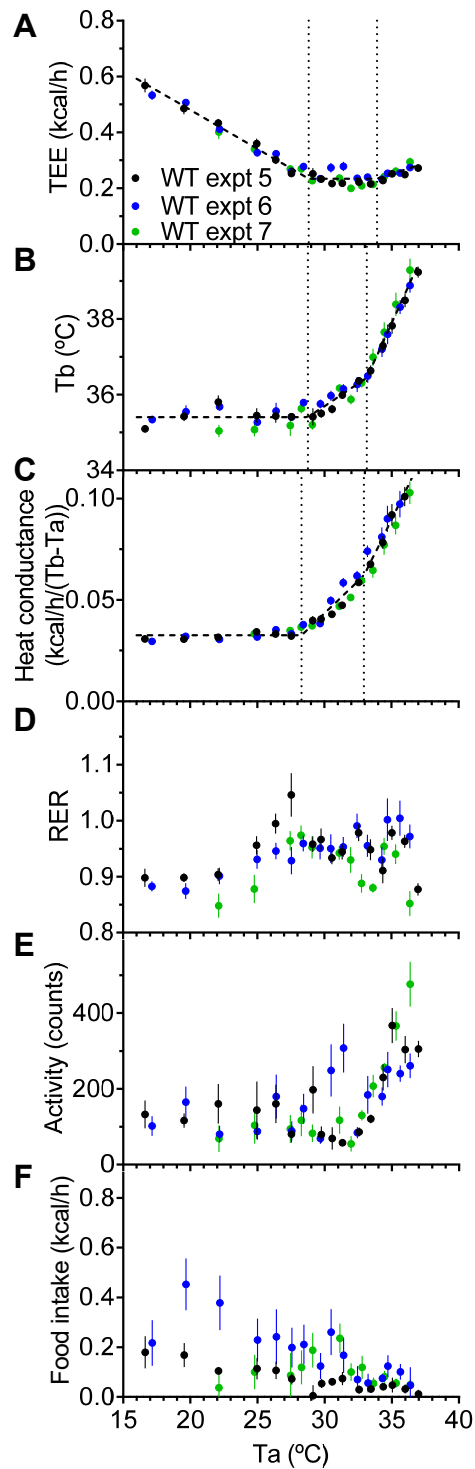

**Figure S3.** Energy metabolism and thermal physiology at high ambient temperatures ( $T_a$ ). Related to Figures 3, 4. Male C57BL/6J mice were studied in three independent experiments during light phase, with measurement of (A) total energy expenditure (TEE), (B) body temperature ( $T_b$ ), (C) heat conductance, (D) respiratory exchange ratio (RER), (E) physical activity, and (F) food intake. Lines and breakpoints (indicated by vertical lines) were calculated by mixed model regression analysis. For visual clarity, only  $T_a$  plateau mean  $\pm$  SEM data points are depicted (each from 65 min, 5 sampling cycles). See Table S1 for regression parameters and  $n$ .
