# Supplementary material
Source: PubMed Central journal article supplement (PMC7243168)
Supplement: NIHMS1584938-supplement-2.pdf [file NIHMS1584938-supplement-2.pdf]

# Cell Reports

## Mouse Thermoregulation: Introducing the Concept of the Thermoneutral Point

### Graphical Abstract

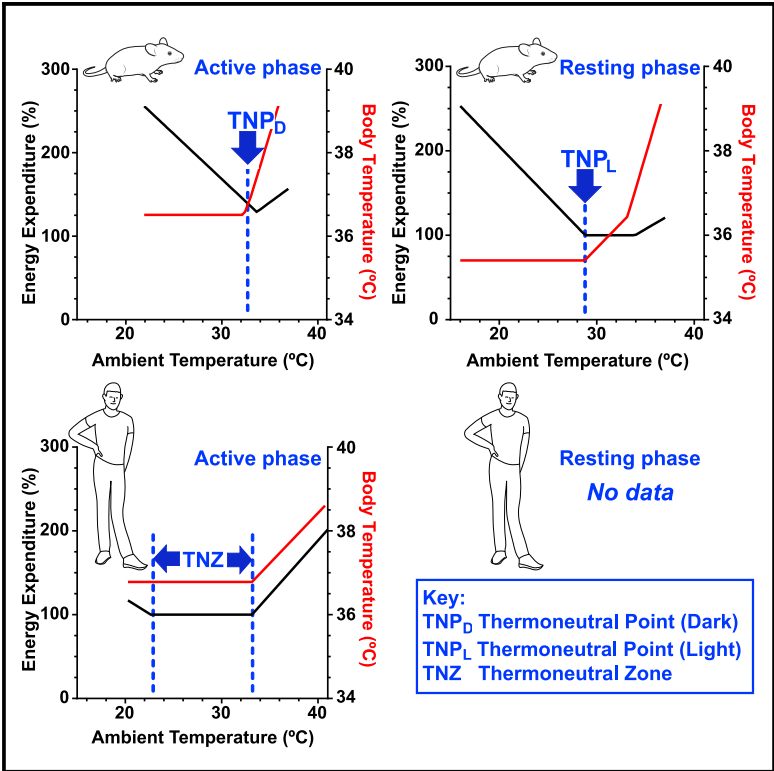

### Authors

Vojtěch Škop, Juen Guo, Naili Liu, Cuiying Xiao, Kevin D. Hall, Oksana Gavrilova, Marc L. Reitman

### Correspondence

marc.reitman@nih.gov

### In Brief

Škop et al. show that the mouse dark-phase thermoneutral zone is a thermoneutral point (TNP), defined as a discrete ambient temperature below which energy expenditure increases and above which body temperature increases. The mouse TNP changes diurnally by ~4°C. Thus, studying mice strictly “at thermoneutrality” is not feasible.

### Highlights

- We develop the thermoneutral point (TNP) concept to describe mouse thermoregulation
- Energy expenditure increases below and body temperature increases above the TNP
- The mouse TNP is 29°C in light phase and 33°C in dark phase, a diurnal change of 4°C
- Studying mice strictly “at thermoneutrality” is not feasible

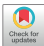

# Mouse Thermoregulation: Introducing the Concept of the Thermoneutral Point

Vojtěch Škop,<sup>1</sup> Juen Guo,<sup>2</sup> Naili Liu,<sup>3</sup> Cuiying Xiao,<sup>1</sup> Kevin D. Hall,<sup>2</sup> Oksana Gavrilova,<sup>3</sup> and Marc L. Reitman<sup>1,4,\*</sup><sup>1</sup>Diabetes, Endocrinology, and Obesity Branch, National Institute of Diabetes and Digestive and Kidney Diseases, NIH, Bethesda, MD 20892, USA<sup>2</sup>Laboratory of Biological Modeling, National Institute of Diabetes and Digestive and Kidney Diseases, NIH, Bethesda, MD 20892, USA<sup>3</sup>Mouse Metabolism Core, National Institute of Diabetes and Digestive and Kidney Diseases, NIH, Bethesda, MD 20892, USA<sup>4</sup>Lead Contact\*Correspondence: [marc.reitman@nih.gov](mailto:marc.reitman@nih.gov)<https://doi.org/10.1016/j.celrep.2020.03.065>

## SUMMARY

Human and mouse thermal physiology differ due to dissimilar body sizes. Unexpectedly, in mice we found no ambient temperature zone where both metabolic rate and body temperature were constant. Body temperature began increasing once cold-induced thermogenesis was no longer required. This result reproduced in male, female, C57BL/6J, 129, chow-fed, diet-induced obese, and *ob/ob* mice as well as *Trpv1*<sup>-/-</sup>; *Trpm8*<sup>-/-</sup>; *Trpa1*<sup>-/-</sup> mice lacking thermal sensory channels. During the resting-light phase, the energy expenditure minimum spanned ~4°C of ambient temperature, whereas in the active-dark phase it approximated a point. We propose the concept of a thermoneutral point (TNP), a discrete ambient temperature below which energy expenditure increases and above which body temperature increases. Humans do not have a TNP. As studied, the mouse TNP is ~29°C in light phase and ~33°C in dark phase. These observations inform how thermoneutrality is defined and how mice are used to model human energy physiology and drug development.

## INTRODUCTION

By 1790, Lavoisier had recognized that energy expenditure of mammals increased in the cold (Lusk, 1928, reprinted 1976), and by 1876, Voit showed that it increased in a hot environment (Rubner, 1902, translated 1982). The ambient temperatures where metabolic rate is at a minimum is the usual definition of the thermoneutral zone (TNZ). A TNZ was depicted at least as early as 1934 (Kleiber and Dougherty, 1934), and the concept was advanced by Scholander's classic studies (Scholander et al., 1950) and provides the framework for understanding thermal physiology (Cannon and Nedergaard, 2011; Gordon, 2012; Kleiber, 1975; Mount, 1973).

The TNZ is critical for understanding the thermal biology differences between mice and humans, which arise due to the 3,000-fold difference in body weight. Mice at typical housing tempera-

tures (20°C–22°C) live below thermoneutrality, and about half of their total energy expenditure (TEE) is devoted to maintaining core body temperature (T<sub>b</sub>). In contrast, humans generally live in a thermoneutral micro-environment, and their T<sub>b</sub> is supported by the “waste” heat byproduct of metabolic processes. Human thermal biology is more organized around heat dissipation, rather than generation or conservation (Ganeshan and Chawla, 2017; Gordon, 1993; Maloney et al., 2014; Reitman, 2018). One can remove this difference by studying mice at thermoneutrality (Feldmann et al., 2009; Fischer et al., 2018; Karp, 2012; Maloney et al., 2014; Overton, 2010; Reitman, 2018), although some have suggested using a cooler environment (Keijer et al., 2019; Speakman and Keijer, 2013). Thus, it is necessary to understand the characteristics of the mouse TNZ.

Energy expenditure has guided the definition of thermoneutrality, with the TNZ determined from the thermoregulatory response curve (of TEE versus ambient temperature [T<sub>a</sub>]), which has three regions (e.g., Figure 4C; Kleiber, 1975). In the center is the TNZ, where metabolic rate is minimal and constant. When measured in the awake, resting, and postabsorptive state, this is the basal metabolic rate (BMR). Heat loss in the TNZ is controlled chiefly by regulating blood flow to superficial sites (Cannon and Nedergaard, 2011; Gordon, 2012; Kingma et al., 2012; Romanovsky, 2018; Romanovsky et al., 2002). Below the TNZ, as the environment becomes cooler, metabolic rate increases linearly, and this line is the energy required to maintain T<sub>b</sub>, the “thermostatic heat requirement,” with the increment over the BMR being cold-induced thermogenesis. The intersection of the BMR and thermostatic heat requirement lines is the lower critical temperature (T<sub>lc</sub>), demarcating the transition between energy-requiring and energy-neutral thermoregulatory mechanisms. At a T<sub>a</sub> above the TNZ, energy expenditure increases due to energy-consuming cooling mechanisms, transitioning at the upper critical temperature (T<sub>uc</sub>). This curve shape is widely applicable in thermal ecology and is valid for cities (Hill et al., 2013) as well as organisms, including mice and humans (Ganeshan and Chawla, 2017; Gordon, 2017; Lichtenbelt et al., 2014; Nedergaard and Cannon, 2014; Speakman, 2013).

There has been ample investigation of mouse thermal biology at or below the T<sub>lc</sub> (Abreu-Vieira et al., 2015; Fischer et al., 2016a, 2016b; Garami et al., 2011; Golozoubova et al., 2004; Högberg et al., 2006; Mount, 1971; Pertwee and Tavendale, 1977; Selman et al., 2001; Speakman and Rossi, 1999). The

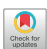

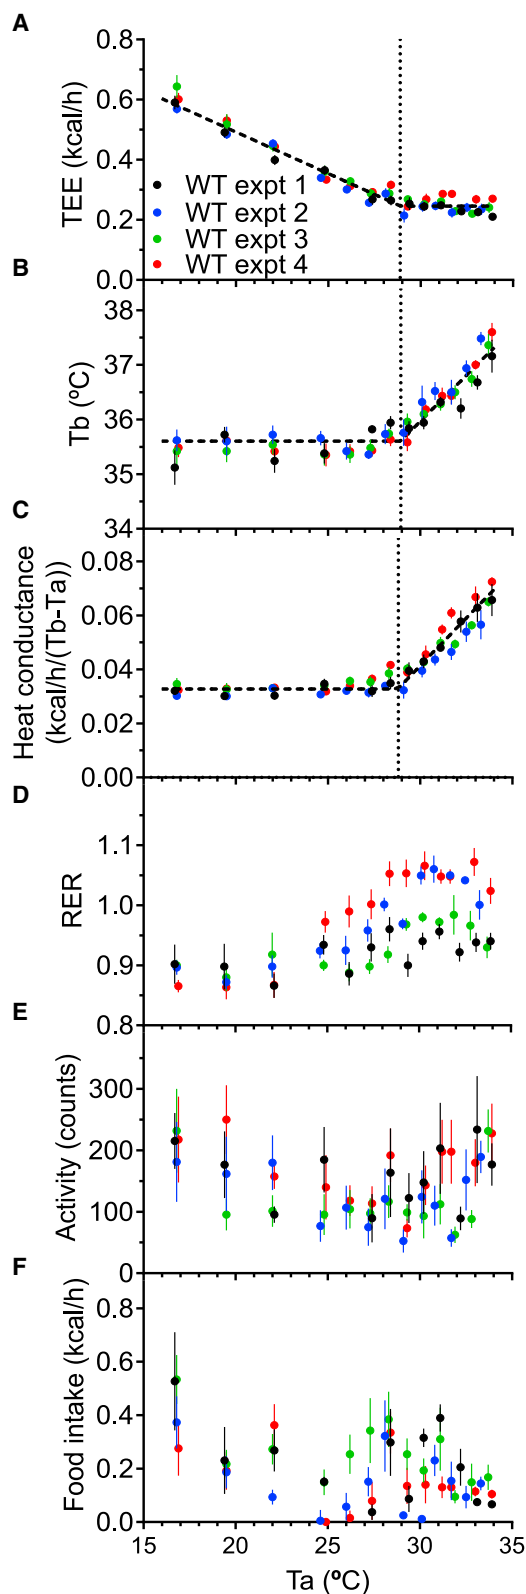

**Figure 1. Effect of Ambient Temperature (Ta) on Thermal Physiology**

(A–F) Male C57BL/6J mice were studied in four independent experiments during light phase, with measurements of total energy expenditure (TEE) (A), body temperature (Tb) (B), heat conductance (C), respiratory exchange ratio (RER) (D), physical activity (E), and food intake (F). Lines and breakpoints (indicated by vertical lines) were calculated by mixed model regression analysis. For visual clarity, only Ta plateau mean  $\pm$  SEM data points are depicted (each from 65 min, 5 sampling cycles, see also Figure S1). See Table S1 for regression parameters and n.

studies at higher Ta are fewer and, although some include Tb data, it was not analyzed in detail (Gordon, 1985; Herrington, 1940; Klaus et al., 1998; Meyer et al., 2004; Oufara et al., 1987; Pennycuik, 1967). Here, we combine the measurement of metabolic rate and Tb over a range of Ta in various types of mice in light and dark phases. Our unexpected findings lead us to propose the concept of the thermoneutral point (TNP) and to discuss the definition of the TNZ for mice and in a more general manner.

## RESULTS

### Mouse Tb Begins to Increase at the Tlc

We measured the effect of Ta on TEE in the control cohorts from four independent experiments during the light phase (Figure 1). Concordant with prior observations, TEE decreased linearly with increasing Ta until a plateau was reached (Figure 1A). The Ta breakpoint (denoted the  $Tlc_{EE}$  [Tlc determined from TEE versus Ta analysis]), below which all heat preservation mechanisms are maximally recruited, was  $28.90^{\circ}\text{C} \pm 0.15^{\circ}\text{C}$ . No increase in TEE above this level was observed at warmer Ta, up to  $34^{\circ}\text{C}$ . The whole-body heat conductance (Mount, 1971) was constant at low Ta and then increased, with a Ta breakpoint, the  $Tlc_{cond}$  [Tlc determined from conductivity vs Ta analysis], of  $28.78^{\circ}\text{C} \pm 0.08^{\circ}\text{C}$  (Figure 1C). Thus,  $Tlc_{EE}$  and  $Tlc_{cond}$  agree remarkably well.

The Tb response to a range of Ta produced a surprising result. As expected, at cooler Ta, the Tb was stable ( $35.60^{\circ}\text{C} \pm 0.07^{\circ}\text{C}$ ). However, at warmer Ta, the Tb increased, reaching  $37.5^{\circ}\text{C}$  at  $Ta = 33.7^{\circ}\text{C}$ , with a slope of  $0.337^{\circ}\text{C} \pm 0.029^{\circ}\text{C}$  of  $Tb/^{\circ}\text{C}$  of Ta (Figure 1B). Remarkably, the Ta breakpoint where the Tb started to increase ( $Tb_{inc}$ ) was at  $28.92^{\circ}\text{C} \pm 0.11^{\circ}\text{C}$ , coincident with the Tlc. No Ta range with both a minimum TEE and non-elevated Tb was detected.

We also measured the respiratory exchange ratio (RER), which was similar to the food quotient at cooler Ta and increased at warmer Ta (Figure 1D). Physical activity varied, sometimes greatly, both within and between experiments (Figure 1E). Because physical activity is a modest contributor to TEE (Abreu-Vieira et al., 2015; Moruppa, 1990; O’Neal et al., 2017; Virtue et al., 2012), we did not incorporate activity into these analyses. Food intake was higher in the cold and was variable (Figure 1F). We also did not incorporate the thermic effect of food into the analyses, due to its variability, small magnitude, and unknown time lag between food ingestion and metabolic rate increase in mice.

Thus, four independent cohorts demonstrate that Tb increases at the Tlc. There was no range of Ta over which both TEE and Tb were constant. Because  $Tlc_{EE}$ ,  $Tlc_{cond}$ , and  $Tb_{inc}$

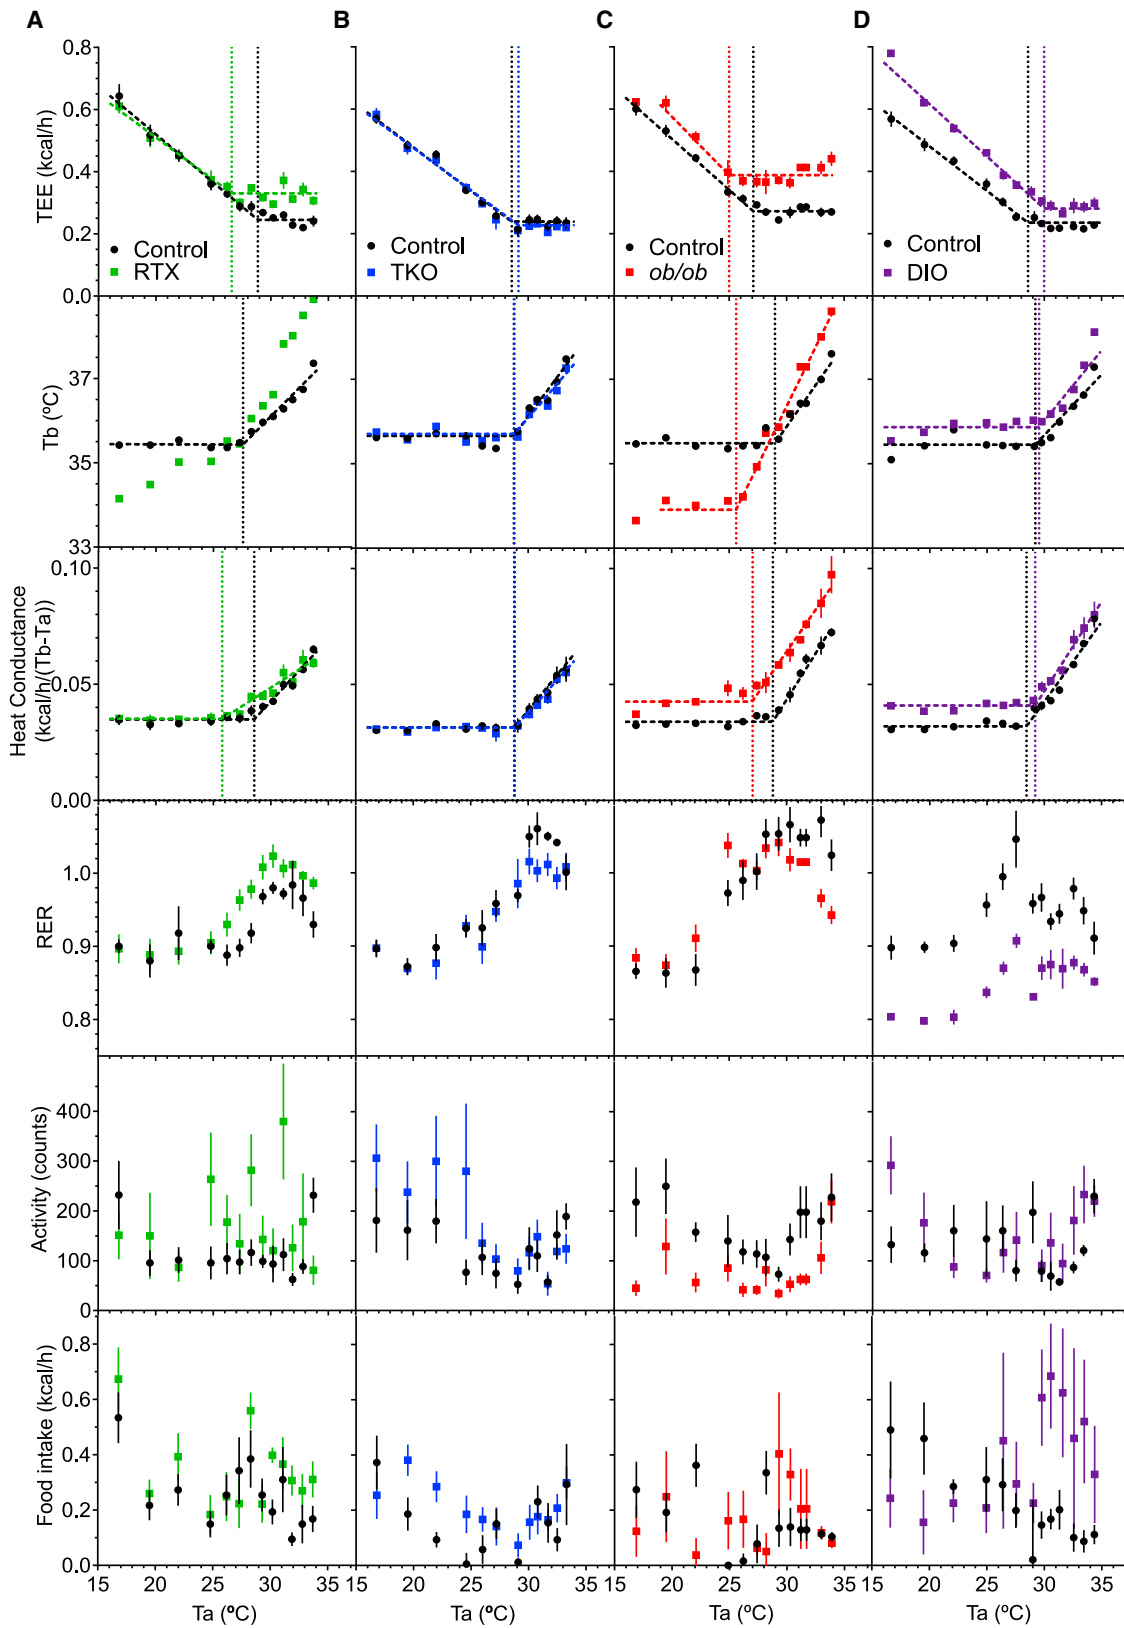

(legend on next page)

all occur at the same  $T_a$ , we refer to this  $T_a$  as the TNP, which we define as the discrete  $T_a$  below which TEE increases and above which  $T_b$  increases.

### Effect of $T_a$ in Mice with Altered Thermal Physiology

We extended the analysis to mouse models with altered thermal physiology, starting with resiniferatoxin (RTX)-treated mice, which have disrupted thermal sensing due to neonatal neuronal ablation (Cavanaugh et al., 2011; Sándor et al., 2009). At 22°C, the baseline  $T_b$  of RTX-treated mice was similar to that of controls, with no difference in light-phase  $T_b$ , dark-phase  $T_b$ , or diurnal rhythm (Figure S2). However, the RTX-treated mice showed significantly greater variation in  $T_b$ , with a  $3.58^\circ\text{C} \pm 0.06^\circ\text{C}$  span between the 5<sup>th</sup> and 95<sup>th</sup> percentiles, compared to a  $2.86^\circ\text{C} \pm 0.11^\circ\text{C}$   $T_b$  span in controls ( $p = 0.0001$ ). When exposed to different  $T_a$ , the RTX-treated mice were somewhat poikilothermic: at cooler  $T_a$  they were cooler than controls and at higher  $T_a$  they were warmer (Figure 2A). The  $T_{IC_{EE}}$  and  $T_{IC_{cond}}$  ( $26.59^\circ\text{C} \pm 0.48^\circ\text{C}$  and  $25.77^\circ\text{C} \pm 0.48^\circ\text{C}$ , respectively) were  $2^\circ\text{C}$ – $3^\circ\text{C}$  cooler than controls. The plateau metabolic rate of the RTX-treated mice was elevated, possibly due to both increased heat loss and the increased  $T_b$ . Because there was no  $T_a$  range over which the  $T_b$  of RTX-treated mice was constant, it is not possible to calculate a  $T_{b_{inc}}$ .

We next studied *Trpv1*<sup>-/-</sup>; *Trpm8*<sup>-/-</sup>; *Trpa1*<sup>-/-</sup> (TKO) mice with germline ablation of three temperature-sensing channels. In TKO mice, the light-phase  $T_b$ , dark-phase  $T_b$ ,  $T_b$  diurnal rhythm,  $T_b$  span, and body weight were not significantly different from controls (Figure S2; Table S1). The TKO mice also did not differ from controls in the  $T_a$  dependence of their  $T_b$ , TEE, or conductance (Figure 2B). Thus, deletion of thermal sensory channels did not detectably alter the TNP or other measured thermal physiology parameters, in marked contrast to RTX-treated mice.

### Thermal Physiology in Leptin-Deficient and Obese Mice

Leptin-deficient (*ob/ob*) mice do not sense their energy stores and, thus, behave as if they are starving: increasing food intake, reducing activity, lowering  $T_b$ , and becoming obese (Fischer et al., 2016b; Höglberg et al., 2006; Trayhurn and James, 1978; Figure 2C; Table S1). At 22°C, the  $T_b$  of *ob/ob* mice was reduced compared to controls (by  $0.76^\circ\text{C} \pm 0.32^\circ\text{C}$  in light and  $0.87^\circ\text{C} \pm 0.25^\circ\text{C}$  in dark phase) with an intact diurnal rhythm (Figure S2).  $T_b$  was approximately constant over  $T_a$  of  $19^\circ\text{C}$ – $25^\circ\text{C}$  but declined more at  $16^\circ\text{C}$ . The  $T_{IC_{EE}}$  ( $25.00^\circ\text{C} \pm 0.34^\circ\text{C}$ ) and  $T_{b_{inc}}$  ( $25.61^\circ\text{C} \pm 0.19^\circ\text{C}$ ) were similarly reduced, by  $\sim 2^\circ\text{C}$ – $3^\circ\text{C}$ . Thus, *ob/ob* mice coordinately orchestrate their thermal physiology to regulate  $T_b$ , aiming for a lower target  $T_b$  (“set point”). Similar to the controls, *ob/ob* mice have a TNP.

Diet-induced obese (DIO) mice had higher  $T_b$  and lower  $T_b$  span than the controls (Figure S2); we have not observed a higher  $T_b$  and lower  $T_b$  span in other DIO cohorts (Abreu-Vieira et al., 2015). The RER of DIO mice was lower, reflecting the lower food quotient (Figure 2D). TEE of DIO mice was higher at all  $T_a$ . The  $T_{IC_{EE}}$  ( $29.99^\circ\text{C} \pm 0.20^\circ\text{C}$ ),  $T_{IC_{cond}}$  ( $29.21^\circ\text{C} \pm 0.12^\circ\text{C}$ ), and

$T_{b_{inc}}$  ( $29.55^\circ\text{C} \pm 0.13^\circ\text{C}$ ) occurred at similar  $T_a$ s, which are slightly higher than the chow-fed controls. Thus, DIO mice also do not have a  $T_a$  range over which TEE and  $T_b$  are constant.

These data suggest that despite differences in values of thermal biology parameters, the thermal behavior of TKO, *ob/ob*, and DIO mice obey the same basic principles governing thermal biology. None of the mice had a range of  $T_a$  over which both TEE and  $T_b$  were constant.

### Thermal Biology at Higher $T_a$ s

We next investigated if TEE increases at higher  $T_a$  ( $>34^\circ\text{C}$ ). Indeed, TEE increased, beginning at  $T_a = 33.91^\circ\text{C} \pm 0.29^\circ\text{C}$  (TEE\_R [breakpoint of the TEE versus  $T_a$  graph, where TEE starts to rise with  $T_a$ ]; Figure S3A).  $T_b$  did not increase linearly, so data were fitted using two  $T_a$  breakpoints. One breakpoint was  $28.76^\circ\text{C} \pm 0.13^\circ\text{C}$  ( $T_{b_{inc}}$ ). The second was at  $33.15^\circ\text{C} \pm 0.08^\circ\text{C}$  ( $T_{b_R}$ ), above which the  $T_b$  increased steeply,  $0.780^\circ\text{C} \pm 0.035^\circ\text{C}$   $T_b/^\circ\text{C}$   $T_a$  (Figure S3B). The TEE and steep  $T_b$  increase were accompanied by increased physical activity (Figure S3E), which may partially explain the TEE increase. The high physical activity, low food intake (Figure S3F), and sharp  $T_b$  increases indicate that above  $T_a \sim 33^\circ\text{C}$ – $34^\circ\text{C}$ ,  $T_b$  regulatory mechanisms are overwhelmed and the mice are under a qualitatively different and severe heat stress.

Mice were housed at  $30^\circ\text{C}$  for 10 days for warm acclimation. After acclimation, light-phase  $T_b$  at  $30^\circ\text{C}$  was  $36.08^\circ\text{C} \pm 0.14^\circ\text{C}$  (versus  $35.49^\circ\text{C} \pm 0.08^\circ\text{C}$  in unacclimated mice at  $22^\circ\text{C}$ ,  $p = 0.0099$ ) and dark-phase  $T_b$  was  $36.80^\circ\text{C} \pm 0.11^\circ\text{C}$  (versus  $36.49^\circ\text{C} \pm 0.07^\circ\text{C}$  in unacclimated mice at  $22^\circ\text{C}$ ,  $p = 0.052$ ). Although TEE\_R increased slightly, there was no clear effect of thermal acclimation on  $T_{IC_{EE}}$ ,  $T_{IC_{cond}}$ , or  $T_{b_{inc}}$  (Figure 3A; Table S1). There was also no major effect on thermal parameters of genotype or sex (Figures 3B and 3C; Table S1).

### Different Thermal Biology during the Dark Phase

We next investigated thermal biology during the dark (active) phase. As expected, the mice were more active, ate more, and had a  $\sim 1^\circ\text{C}$  higher  $T_b$  (Figures 3D and S2). In addition, the TEE versus  $T_a$  graph was strikingly different from the light phase, with the minimum TEE being restricted to a very narrow  $T_a$  range, approximating a point. This dark-phase  $T_{IC_{EE}}$  ( $33.94^\circ\text{C} \pm 0.14^\circ\text{C}$ ) occurred coincident with the higher light-phase breakpoint (TEE\_R). The  $T_b$  versus  $T_a$  graph also showed a single breakpoint ( $32.77^\circ\text{C} \pm 0.13^\circ\text{C}$ ), coincident with the higher light-phase breakpoint ( $T_{b_R}$ ), with the slope above this point ( $0.62^\circ\text{C} \pm 0.03^\circ\text{C}$   $T_b/^\circ\text{C}$   $T_a$ ) similar to the slope above the light phase  $T_{b_R}$ . The  $T_b$  breakpoint may be at a slightly lower  $T_a$  than the TEE breakpoint. We designate the single dark-phase breakpoint as the  $TNP_D$ . The conductance versus  $T_a$  plot was curvilinear, without clear linear portions. These data demonstrate fundamental differences between light and dark phase thermal biology. In dark phase, the minimum TEE zone, the TNZ, approximates a point (the  $TNP_D$ ), above which both TEE and  $T_b$  increase.

### Figure 2. Effect of Ambient Temperature in Mice with Altered Thermal Physiology

(A–D) Thermal biology of resiniferatoxin-treated (RTX) (A), *Trpv1*<sup>-/-</sup>; *Trpm8*<sup>-/-</sup>; *Trpa1*<sup>-/-</sup> (TKO) (B), *ob/ob* (C), and diet-induced obese (DIO) (D) mice. See Figure 1 legend for details and Table S1 for regression parameters and n.

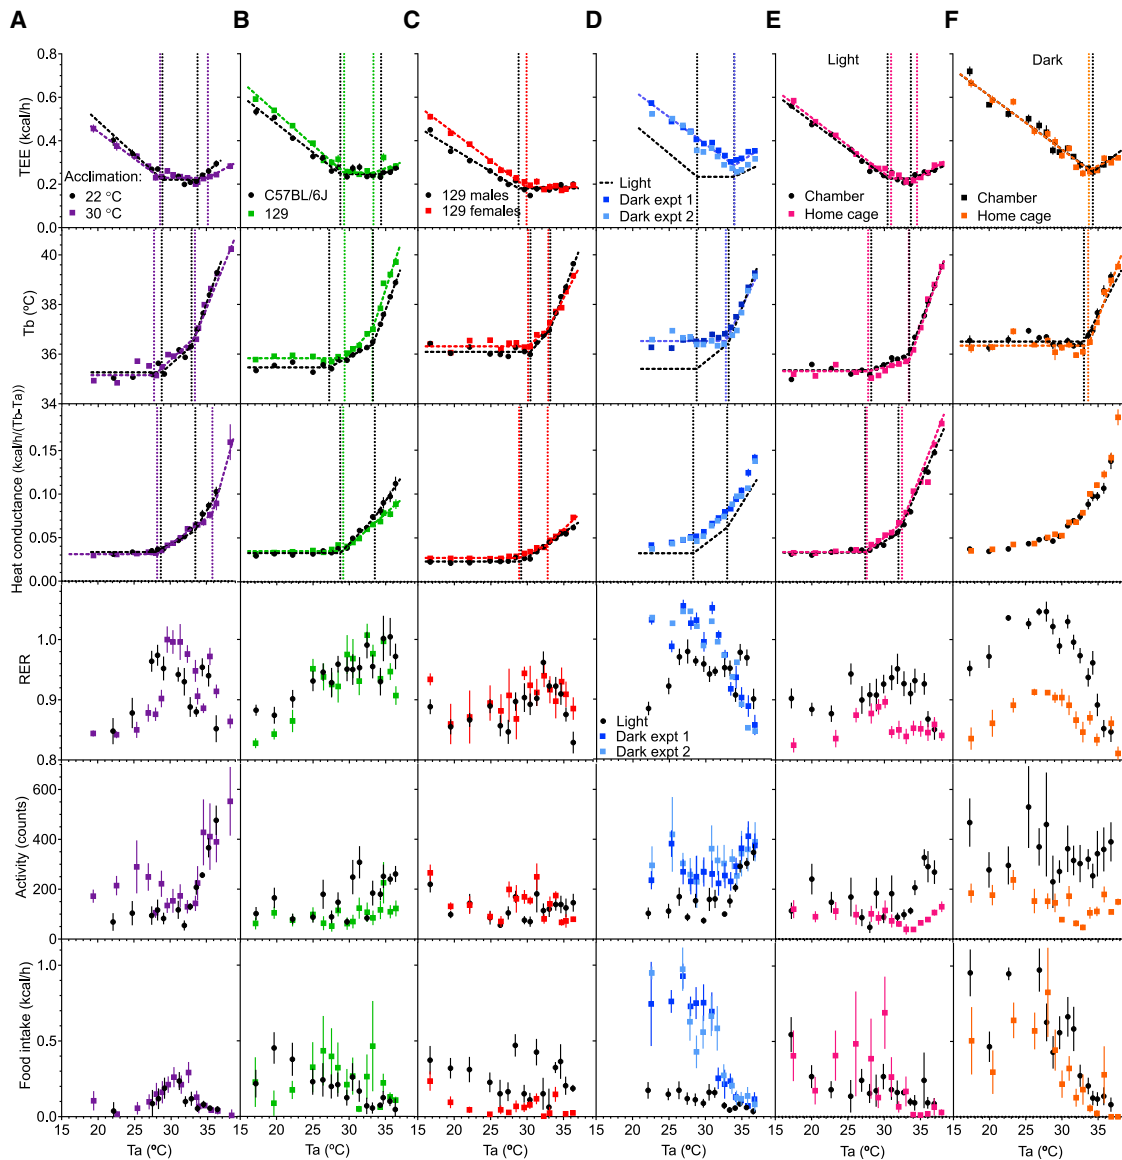

**Figure 3. Thermal Biology at Higher Ambient Temperatures**

(A) Effect of warm acclimation (30°C for 10 days) versus controls kept at 22°C.

(B) Effect of C57BL/6J versus 129 genotype.

(C) Effect of sex in 129 mice; male versus female.

(D) Light phase (from Figure S3) compared to dark phase.

(E) Light phase comparison of chamber and home cage.

(F) Dark phase comparison of chamber and home cage. Mice were studied during light phase (except D and F). See Figure 1 legend for details and Table S1 for regression parameters and n.

### Generality of the Observations

One limitation of our data is that by testing many  $T_a$ s, an individual  $T_a$  is represented by few data points. To address this, all the data were used in each regression analysis. To probe the effect of a longer time (24 h) at each  $T_a$ , we re-analyzed previous data (Abreu-Vieira et al., 2015) by using segmented regression and obtained similar results as with more rapid  $T_a$  transitions (Table S1). We also tested more typical vivarium conditions with a sec-

ond indirect calorimetry system by using standard “home cages” with bedding. The same mice were studied in both the original CLAMS and the home cage systems under both light-phase and dark-phase conditions (Figures 3E and 3F). The data and parameters calculated from the two systems agreed remarkably well. Thus, the observations do not depend on the specific calorimetry system or caging conditions, supporting the robustness and generality of the observations.

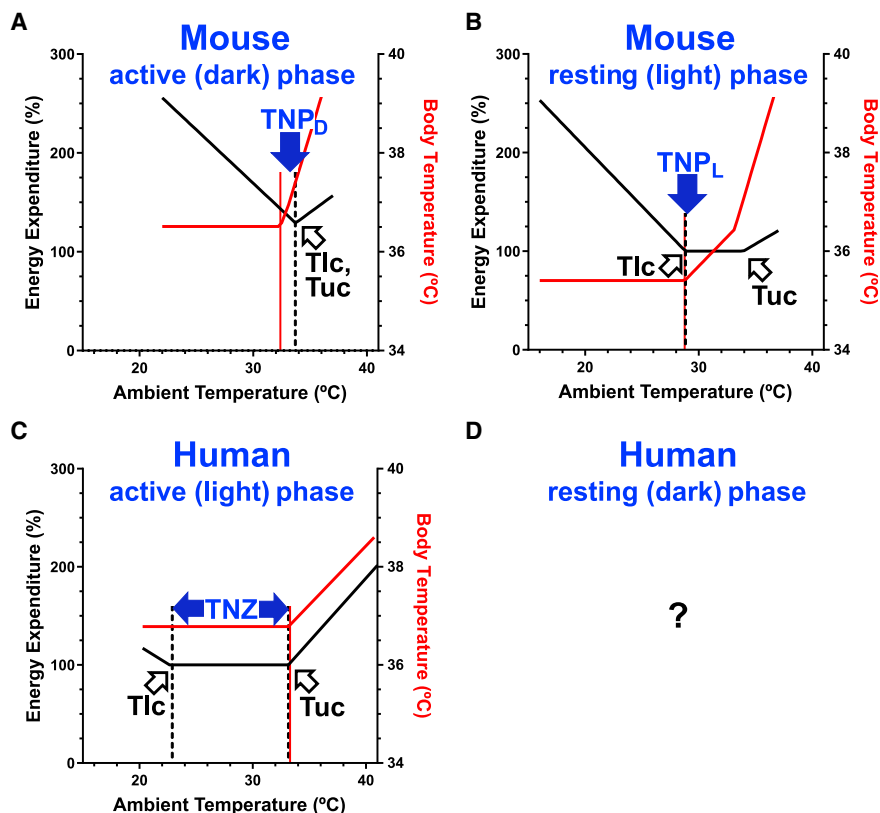

**Figure 4. Thermoneutrality in Humans Compared to Mice**

(A and B) Mice have a thermoneutral point (TNP), a discrete ambient temperature below which energy expenditure increases and above which body temperature increases. The mouse TNP depends on the body temperature and, thus, the phase of the diurnal cycle; higher in the active-dark phase ( $TNP_D$ ) (A) and lower in the resting-light phase ( $TNP_L$ ) (B). Energy expenditure 100% is 0.23 kcal/h. Equation parameters are in Table S1. (C and D) In contrast, humans have a multi-degree thermoneutral zone (TNZ) in the active-light phase (C), determined by the Tlc (lower critical temperature; breakpoint in energy expenditure) and the Tuc (upper critical temperature; second breakpoint in energy expenditure). Humans do not have an active-phase TNP. We are not aware of comparable human studies in the resting phase (D). Body temperature data for lightly clothed humans are from McConnell and Yagloglou (1925). Energy expenditure data for lightly clothed humans are derived from Brychta et al. (2019) and McConnell and Yagloglou (1925); 100% is 72 kcal/h. Naked men have a 4°C warmer Tlc and a 44% steeper slope below the Tlc (Hill et al., 2013).

## DISCUSSION

We measured TEE at various  $T_a$ s with continuous  $T_b$  monitoring in mice and found no range of  $T_a$ s over which both TEE and  $T_b$  were constant (Figure 4). Mouse thermal physiology was also different between the dark and light periods. During the dark phase, a single transition ( $TNP_D$ ) occurred in both the  $T_b$  and TEE, at a  $T_a$  of  $\sim 33^\circ\text{C}$ . Further investigation is needed to determine if the  $T_b$  increase started at the TEE minimum or just below it. At  $T_a$ s below the  $TNP_D$ ,  $T_b$  was constant and TEE increased, whereas above the  $TNP_D$ , both  $T_b$  and TEE increased.

In contrast, during the light phase there were two breakpoints. Above  $\sim 29^\circ\text{C}$  (the  $TNP_L$  [light phase TNP]),  $T_b$  increased gently ( $\sim 0.3^\circ\text{C } T_b/^\circ\text{C } T_a$ ) and TEE was constant. Above  $\sim 33^\circ\text{C}$  (the  $TNP_D$ ), the TEE increased and the  $T_b$  increased more rapidly, with similar slopes in the light and dark phases ( $\sim 0.7^\circ\text{C } T_b/^\circ\text{C } T_a$ ). This indicates that between  $TNP_L$  and  $TNP_D$ , the  $T_b$  target (or “set”) point is regulated upward from the lower light-resting phase  $T_b$  to the warmer dark-active phase  $T_b$ . The modestly increasing  $T_b$  illustrates a mixed approach in thermal physiology, dissipating some and storing some of the excess heat, reducing the demand for heat loss. Once  $T_b$  reaches the  $TNP_D$ , heat loss mechanisms are insufficient and overwhelmed.

The utility of the TNP concept is its explicit incorporation of  $T_b$ , which is more variable in mammals with small body sizes. Prior data in gerbils (Pan et al., 2014), hamsters (Zhao et al., 2014), and mice (Fischer et al., 2016b; Meyer et al., 2004) showing an

increase in  $T_b$  at a lower  $T_a$  than the increase in metabolic rate are consistent with our observations. Very small mammals have a minimal thermal shell, so vasoconstriction and vasodilation have a relatively modest effect and occur over a narrow  $T_a$  span. Although we (Reitman, 2018) and others (Ganeshan and Chawla, 2017; Gordon, 2017; Lichtenbelt et al., 2014; Nedergaard and Cannon, 2014; Speakman, 2013) have depicted mice having a broad TNZ, the dark-phase TNZ being a point is a consequence of the small body size.

### Relationship between the TNP and TNZ

The TNZ is formally defined as “the  $T_a$  range in which temperature regulation is achieved only by control of sensible heat loss, i.e., without regulatory changes in metabolic heat production or evaporative heat loss” (Bligh and Johnson, 1973; IUPS, 2001) and does not include  $T_b$ . We define TNP as a discrete  $T_a$  below which TEE increases and above which  $T_b$  increases, explicitly incorporating  $T_b$ .

Because the TNZ and TNP are defined differently, there is not a constant relationship between them. In the mouse dark phase, the TNZ is a point and the same as the  $TNP_D$ . In contrast, in the mouse light phase (assuming  $T_b$  is regulated by non-evaporative heat loss, which we did not measure), TEE is constant over  $\sim 4^\circ\text{C}$ , defining a TNZ. Because  $T_b$  is gradually increasing in this TNZ, the lower bound of the TNZ (the Tlc) is coincident with the  $TNP_L$ .

### No Evidence for a TNP in Humans

Not all homeotherm organisms will have a TNP. For example, humans have an active phase TNZ with a Tlc of  $21^\circ\text{C} - 23^\circ\text{C}$  (lightly

clothed; Brychta et al., 2019) to 26°C–27°C (naked; Hill et al., 2013; reviewed in Brychta and Chen, 2017; Figure 4C). Fewer studies have measured both TEE and Tb in a range of warm conditions (Bradbury et al., 1967; Hardy and Du Bois, 1940; Hardy and Stolwijk, 1966; Houghton et al., 1929; McConnell and Yagloglou, 1925; Rubner, 1902, translated 1982). From data in McConnell and Yagloglou, (1925), we estimate an “effective temperature” Tuc of ~33°C for lightly clothed men (the effective temperature is determined from air velocity and wet and dry bulb temperatures and is equal or below the dry bulb temperature), which is also where Tb started to increase (Figure 4C). Thus, the human active-light phase TNZ (lightly clothed) is ~21°C–23°C to ~33°C and there is no TNP.

The human inactive-dark phase has a lower Tb (Refinetti, 2010) and TEE, so compared to the active-light phase, the Tlc and Tuc will be similar or slightly lower, the TNZ similar or slightly broader, and, again, no TNP is expected. However, we are not aware of human studies of both Tb and TEE during a range of nighttime Ta.

### TNZ Definition

A mouse housed in the light phase at 33°C is physiologically different from one housed at 29°C; yet, both could be at thermoneutrality under the current TNZ definition. Should the TNZ definition be revised? One could rephrase the TNZ definition as “the Ta range between the Tlc and Tuc,” focusing on the Tlc and Tuc individually. The current Tlc definition, the Ta below which energy-expending processes are required to maintain Tb, or “the Ta below which the rate of metabolic heat production of a resting thermoregulating tachymetabolic animal must be increased by shivering and/or nonshivering thermogenesis in order to maintain thermal balance,” (IUPS, 2001) needs no reconsideration.

The Tuc is commonly defined as the Ta above which metabolic rate starts to increase (Ganeshan and Chawla, 2017; Gordon, 2017; Lichtenbelt et al., 2014; Nedergaard and Cannon, 2014; Romanovsky, 2018; Speakman, 2013) or “the Ta above which the rate of evaporative heat loss of a resting thermoregulating animal must be increased ... in order to maintain thermal balance” (IUPS, 2001). Evaporative heat dissipation, typically by respiratory or cutaneous water loss, is the main cooling mechanism at warm Ta and the only one when Ta is higher than Tb (although mice can groom saliva onto skin, this indicates severe heat stress and mice do not routinely use evaporative heat loss) (Adolph, 1947; Hainsworth, 1967; Perissin et al., 2000; Roberts et al., 1974; Szymusiak and Satinoff, 1981). However, increases in evaporative heat loss, metabolic rate, and Tb may each start at different Tas (Baldo et al., 2015; Cooper et al., 2018; McKechnie et al., 2017; O'Connor et al., 2017; Talbot et al., 2017). Humans increase evaporative loss at a lower Ta than the rise in metabolic rate and Tb (Gagge et al., 1967; Hardy and Du Bois, 1940).

The above Tuc definitions do not consider Tb, which is an important factor in small species. We suggest a consideration of Tb in the Tuc definition, for example, making the Tuc the highest Ta above which any of the following occurs: (1) resting metabolic rate increases, (2) rate of evaporative heat loss increases, or (3) Tb increases. Use of the Tb increase as a Tuc definition has been opposed to avoid confusion with the upper tempera-

ture survival limit (IUPS, 2001). However, in species or situations using little evaporative heat loss, the Tb increase seems like a reasonable option for the Tuc.

Our results underscore that Tb must be measured to fully understand energy homeostasis, particularly in small organisms.

### Using Mice to Model Human Physiology

Understanding mouse thermal physiology improves the use of mice to model human physiology. Mice are typically housed below, whereas humans effectively live at, thermoneutrality. One option is to nullify cold-induced thermogenesis by studying mice at thermoneutrality, often using 30°C (Feldmann et al., 2009; Fischer et al., 2018; Karp, 2012; Maloney et al., 2014; Overton, 2010; Reitman, 2018). Another suggestion is that because human TEE is typically about 1.7 × BMR, one should choose a Ta (25°C–27°C) to study mice where their TEE is also 1.7 × BMR (Keijer et al., 2019; Speakman and Keijer, 2013). However, based on how mouse BMR is measured, others suggest that mice at 30°C are already at 1.8 × BMR (Fischer et al., 2018, 2019).

How do our results inform studying mice at thermoneutrality? By the classic energy expenditure TNZ definition, in the light phase, the TNP<sub>L</sub> to TNP<sub>D</sub> range is the TNZ. However, to avoid a Tb increase, mice in the light phase should be studied at the TNP<sub>L</sub>. In the dark phase, the TNZ is the TNP<sub>D</sub>, so mice should be studied at the TNP<sub>D</sub>. Thus, to minimize thermal physiology perturbations, mice would be housed at their TNP on a diurnal cycle (~29°C in light phase and ~33°C in dark phase, a four-degree change every 12 hours).

This analysis suggests that studying mice strictly at thermoneutrality is nearly impossible. Achieving sufficiently rapid and strict Ta control is difficult. The recommended mouse facility Ta is 20°C–26°C (National Research Council, 2011) and vivariums typically do not control Ta more tightly than ±1°C. Additionally, choosing the target Ta requires knowing the TNPs, which depend on experimental conditions: mouse Tlc (a mouse TNP surrogate) are reported to range from 24°C to 32°C (Speakman and Keijer, 2013). Variables that may affect mouse energy homeostasis and the TNP include genetics (e.g., *ob/ob*); relative humidity and air circulation (Gagge and Gonzalez, 1996); bedding (Gordon, 1993); group versus single housing (Gordon, 2017; Mount and Willmott, 1967); body weight (Speakman and Keijer, 2013); sex, and acclimation, noise, and stress in the vivarium.

We hypothesize that a Ta for chronically housing mice to better model human thermal biology would be just below the TNP<sub>L</sub>, while strenuously avoiding exceeding it. Under our conditions, a Ta of ~28°C–29°C might be a reasonable choice for wild-type mice. This allows the mouse to self-regulate energy expenditure and Tb, while minimizing cold-induced thermogenesis and allowing for the real-world practicalities of environmental thermal control. A fail safe would include monitoring Tb to ensure that it is not increasing.

A Ta of 30°C has been commonly used as a thermoneutral Ta. Experiments at this Ta increase the adiposity of mice, such as that induced by a high-fat diet (Feldmann et al., 2009) or with ablated UCP1 (Feldmann et al., 2009) or type 2 deiodinase (Castillo et al., 2011). Conversely, treatment with dinitrophenol (Goldhof



et al., 2014) or a  $\beta$ 3-adrenergic agonist (Xiao et al., 2015) reduced body weight at 30°C but not at 22°C. Other physiology that is different at 30°C includes worse vascular inflammation and atherosclerosis (Giles et al., 2016; Tian et al., 2016) and reduced tumor growth and improved immune response to tumors (Hylander et al., 2019; Kokolus et al., 2013). When using a Ta of 30°C, the physiologic effects could be due to reduced brown adipose tissue (BAT) activity, energy expenditure, food intake, or sympathetic tone; increased Tb; and/or other mechanisms. For example, an elevated Tb stimulates the immune system, and this could augment an inflammatory state, affecting response to infection (Evans et al., 2015). A warm environment prevents heat loss, precluding hypothermic states (Ganeshan et al., 2019).

In contrast, a high Ta (30°C) can be useful for studying acute physiology, such as the effect of a drug to increase energy expenditure. Mice have robust thermogenic mechanisms that are attenuated by housing at or above the Tlc. Thus, acutely moving mice from the customary 20°C–22°C to at or above the TNP<sub>L</sub> sensitizes the detection of a drug effect, preventing confounding by a compensatory reduction in cold-induced thermogenesis. A light-phase Ta of 30°C seems reasonable for this purpose.

In summary, we emphasize the concept of a TNP, below which TEE increases and above which Tb increases. In the mouse, the dark-phase and light-phase TNPs differ by  $\sim$ 4°C, raising questions about how to study the mouse at thermoneutrality. This knowledge informs the use of mice to model human energy physiology and drug development.

## STAR★METHODS

Detailed methods are provided in the online version of this paper and include the following:

- KEY RESOURCES TABLE
- LEAD CONTACT AND MATERIALS AVAILABILITY
  - Lead Contact
  - Materials Availability
  - Data Code Availability
- EXPERIMENTAL MODEL AND SUBJECT DETAILS
  - Mice
- METHOD DETAILS
  - Indirect calorimetry systems
  - Ambient temperature changes setup
  - Body temperature telemetry
- QUANTIFICATION AND STATISTICAL ANALYSIS

## SUPPLEMENTAL INFORMATION

Supplemental Information can be found online at <https://doi.org/10.1016/j.celrep.2020.03.065>.

## ACKNOWLEDGMENTS

We thank Dr. Alexander Chesler for the TKO mice and advice; Alice Franks, Yuning Huang, and Jun Feranil for experimental contributions; and Drs. Gustavo Abreu-Vieira, Kong Chen, Aaron Cypess, Ramón Piñol, Sushil Rane, and Lee Weinstein for helpful comments. This research was supported by the Intramural Research Program of the National Institutes of Health, National

Institute of Diabetes and Digestive and Kidney Diseases (ZIA DK075062, ZIA DK075063, ZIA DK075064, and ZIA DK070002).

## AUTHOR CONTRIBUTIONS

V.S., O.G., K.D.H., and M.L.R. conceived experiments. V.S., O.G., N.L., and C.X. performed experiments. J.G. provided statistical analysis. V.S. and M.L.R. wrote the original draft. All authors reviewed and edited the manuscript.

## DECLARATION OF INTERESTS

The authors declare no competing interests.

Received: June 27, 2019

Revised: November 18, 2019

Accepted: March 19, 2020

Published: April 14, 2020

## REFERENCES

- Abreu-Vieira, G., Xiao, C., Gavrilova, O., and Reitman, M.L. (2015). Integration of body temperature into the analysis of energy expenditure in the mouse. *Mol. Metab.* *4*, 461–470.
- Adolph, E.F. (1947). Tolerance to heat and dehydration in several species of mammals. *Am. J. Physiol.* *151*, 564–575.
- Baldo, M.B., Antenucci, C.D., and Luna, F. (2015). Effect of ambient temperature on evaporative water loss in the subterranean rodent *Ctenomys talarum*. *J. Therm. Biol.* *53*, 113–118.
- Bautista, D.M., Jordt, S.E., Nikai, T., Tsuruda, P.R., Read, A.J., Poblete, J., Yamoah, E.N., Basbaum, A.I., and Julius, D. (2006). TRPA1 mediates the inflammatory actions of environmental irritants and proalgesic agents. *Cell* *124*, 1269–1282.
- Bautista, D.M., Siemens, J., Glazer, J.M., Tsuruda, P.R., Basbaum, A.I., Stucky, C.L., Jordt, S.E., and Julius, D. (2007). The menthol receptor TRPM8 is the principal detector of environmental cold. *Nature* *448*, 204–208.
- Bligh, J., and Johnson, K.G. (1973). Glossary of terms for thermal physiology. *J. Appl. Physiol.* *35*, 941–961.
- Bradbury, P.A., Fox, R.H., Goldsmith, R., Hampton, I.F., and Muir, A.L. (1967). Resting metabolism in man at elevated body temperatures. *J. Physiol.* *189*, 61P–62P.
- Brychta, R.J., and Chen, K.Y. (2017). Cold-induced thermogenesis in humans. *Eur. J. Clin. Nutr.* *71*, 345–352.
- Brychta, R.J., Huang, S., Wang, J., Leitner, B.P., Hattenbach, J.D., Bell, S.L., Fletcher, L.A., Perron Wood, R., Idelson, C.R., Duckworth, C.J., et al. (2019). Quantification of the Capacity for Cold-Induced Thermogenesis in Young Men With and Without Obesity. *J. Clin. Endocrinol. Metab.* *104*, 4865–4878.
- Cannon, B., and Nedergaard, J. (2011). Nonshivering thermogenesis and its adequate measurement in metabolic studies. *J. Exp. Biol.* *214*, 242–253.
- Castillo, M., Hall, J.A., Correa-Medina, M., Ueta, C., Kang, H.W., Cohen, D.E., and Bianco, A.C. (2011). Disruption of thyroid hormone activation in type 2 deiodinase knockout mice causes obesity with glucose intolerance and liver steatosis only at thermoneutrality. *Diabetes* *60*, 1082–1089.
- Caterina, M.J., Leffler, A., Malmberg, A.B., Martin, W.J., Trafton, J., Petersen-Zeit, K.R., Koltzenburg, M., Basbaum, A.I., and Julius, D. (2000). Impaired nociception and pain sensation in mice lacking the capsaicin receptor. *Science* *288*, 306–313.
- Cavanaugh, D.J., Chesler, A.T., Bráz, J.M., Shah, N.M., Julius, D., and Basbaum, A.I. (2011). Restriction of transient receptor potential vanilloid-1 to the peptidergic subset of primary afferent neurons follows its developmental downregulation in nonpeptidergic neurons. *J. Neurosci.* *31*, 10119–10127.
- Clayton, Z.S., and McCurdy, C.E. (2018). Short-term thermoneutral housing alters glucose metabolism and markers of adipose tissue browning in response to a high-fat diet in lean mice. *Am. J. Physiol. Regul. Integr. Comp. Physiol.* *315*, R627–R637.

- Cooper, C.E., Withers, P.C., Munns, S.L., Geiser, F., and Buttemer, W.A. (2018). Geographical variation in the standard physiology of brushtail possums (*Trichosurus*): implications for conservation translocations. *Conserv. Physiol.* 6, coy042.
- Evans, S.S., Repasky, E.A., and Fisher, D.T. (2015). Fever and the thermal regulation of immunity: the immune system feels the heat. *Nat. Rev. Immunol.* 15, 335–349.
- Feldmann, H.M., Golozoubova, V., Cannon, B., and Nedergaard, J. (2009). UCP1 ablation induces obesity and abolishes diet-induced thermogenesis in mice exempt from thermal stress by living at thermoneutrality. *Cell Metab.* 9, 203–209.
- Fischer, A.W., Csikasz, R.I., von Essen, G., Cannon, B., and Nedergaard, J. (2016a). No insulating effect of obesity. *Am. J. Physiol. Endocrinol. Metab.* 311, E202–E213.
- Fischer, A.W., Hoefig, C.S., Abreu-Vieira, G., de Jong, J.M.A., Petrovic, N., Mittag, J., Cannon, B., and Nedergaard, J. (2016b). Leptin Raises Defended Body Temperature without Activating Thermogenesis. *Cell Rep.* 14, 1621–1631.
- Fischer, A.W., Cannon, B., and Nedergaard, J. (2018). Optimal housing temperatures for mice to mimic the thermal environment of humans: An experimental study. *Mol. Metab.* 7, 161–170.
- Fischer, A.W., Cannon, B., and Nedergaard, J. (2019). The answer to the question “What is the best housing temperature to translate mouse experiments to humans?” is: thermoneutrality. *Mol. Metab.* 26, 1–3.
- Gagge, A.P., and Gonzalez, R.R. (1996). Mechanisms of heat exchange: biophysics and physiology. In *Handbook of Physiology*, M.J. Fregly and C.M. Blatteis, eds. (Environmental Physiology), pp. 45–84.
- Gagge, A.P., Stolwijk, J.A., and Hardy, J.D. (1967). Comfort and thermal sensations and associated physiological responses at various ambient temperatures. *Environ. Res.* 1, 1–20.
- Ganeshan, K., and Chawla, A. (2017). Warming the mouse to model human diseases. *Nat. Rev. Endocrinol.* 13, 458–465.
- Ganeshan, K., Nikkanen, J., Man, K., Leong, Y.A., Sogawa, Y., Maschek, J.A., Van Ry, T., Chagwedera, D.N., Cox, J.E., and Chawla, A. (2019). Energetic Trade-Offs and Hypometabolic States Promote Disease Tolerance. *Cell* 177, 399–413.e312.
- Garami, A., Pakai, E., Oliveira, D.L., Steiner, A.A., Wanner, S.P., Almeida, M.C., Lesnikov, V.A., Gavva, N.R., and Romanovsky, A.A. (2011). Thermoregulatory phenotype of the *Trpv1* knockout mouse: thermoeffector dysbalance with hyperkinesia. *J. Neurosci.* 31, 1721–1733.
- Giles, D.A., Ramkhalawon, B., Donelan, E.M., Stankiewicz, T.E., Hutchison, S.B., Mukherjee, R., Cappelletti, M., Karns, R., Karp, C.L., Moore, K.J., and Divanovic, S. (2016). Modulation of ambient temperature promotes inflammation and initiates atherosclerosis in wild type C57BL/6 mice. *Mol. Metab.* 5, 1121–1130.
- Goldgof, M., Xiao, C., Chanturiya, T., Jou, W., Gavrilova, O., and Reitman, M.L. (2014). The chemical uncoupler 2,4-dinitrophenol (DNP) protects against diet-induced obesity and improves energy homeostasis in mice at thermoneutrality. *J. Biol. Chem.* 289, 19341–19350.
- Golozoubova, V., Gullberg, H., Matthias, A., Cannon, B., Vennström, B., and Nedergaard, J. (2004). Depressed thermogenesis but competent brown adipose tissue recruitment in mice devoid of all hormone-binding thyroid hormone receptors. *Mol. Endocrinol.* 18, 384–401.
- Gordon, C.J. (1985). Relationship between autonomic and behavioral thermoregulation in the mouse. *Physiol. Behav.* 34, 687–690.
- Gordon, C.J. (1993). *Temperature regulation in laboratory rodents* (Cambridge University Press).
- Gordon, C.J. (2012). Thermal physiology of laboratory mice: Defining thermoneutrality. *J. Therm. Biol.* 37, 654–685.
- Gordon, C.J. (2017). The mouse thermoregulatory system: Its impact on translating biomedical data to humans. *Physiol. Behav.* 179, 55–66.
- Hainsworth, F.R. (1967). Saliva spreading, activity, and body temperature regulation in the rat. *Am. J. Physiol.* 212, 1288–1292.
- Hardy, J.D., and Du Bois, E.F. (1940). Differences between men and women in their response to heat and cold. *Proc. Natl. Acad. Sci. USA* 26, 389–398.
- Hardy, J.D., and Stolwijk, J.A. (1966). Partitional calorimetric studies of man during exposures to thermal transients. *J. Appl. Physiol.* 21, 1799–1806.
- Herrington, L.P. (1940). The heat regulation of small laboratory animals at various environmental temperatures. *Am. J. Physiol.* 129, 123–139.
- Hill, R.W., Muhich, T.E., and Humphries, M.M. (2013). City-scale expansion of human thermoregulatory costs. *PLoS One* 8, e76238.
- Högberg, H., Engblom, L., Ekdahl, A., Lidell, V., Walum, E., and Alberts, P. (2006). Temperature dependence of O<sub>2</sub> consumption; opposite effects of leptin and etomoxir on respiratory quotient in mice. *Obesity (Silver Spring)* 14, 673–682.
- Houghton, F.C., Teague, W.W., Miller, W.E., and Yant, W.P. (1929). Thermal exchange between the human body and its atmospheric environment. *Am. J. Physiol.* 88, 386–406.
- Hylander, B.L., Gordon, C.J., and Repasky, E.A. (2019). Manipulation of Ambient Housing Temperature To Study the Impact of Chronic Stress on Immunity and Cancer in Mice. *J. Immunol.* 202, 631–636.
- IUPS (2001). Glossary of terms for thermal physiology. *Jpn. J. Physiol.* 51, 245–280.
- Karp, C.L. (2012). Unstressing interperate models: how cold stress undermines mouse modeling. *J. Exp. Med.* 209, 1069–1074.
- Keijer, J., Li, M., and Speakman, J.R. (2019). What is the best housing temperature to translate mouse experiments to humans? *Mol. Metab.* 25, 168–176.
- Kingma, B., Frijns, A., and van Marken Lichtenbelt, W. (2012). The thermoneutral zone: implications for metabolic studies. *Front. Biosci. (Elite Ed.)* 4, 1975–1985.
- Klaus, S., Münzberg, H., Trüloff, C., and Heldmaier, G. (1998). Physiology of transgenic mice with brown fat ablation: obesity is due to lowered body temperature. *Am. J. Physiol.* 274, R287–R293.
- Kleiber, M. (1975). *The Fire of Life* (Robert E. Krieger Publishing Company).
- Kleiber, M., and Dougherty, J.E. (1934). The influence of environmental temperature on the utilization of food energy in baby chicks. *J. Gen. Physiol.* 17, 701–726.
- Kokulus, K.M., Capitano, M.L., Lee, C.T., Eng, J.W., Waight, J.D., Hylander, B.L., Sexton, S., Hong, C.C., Gordon, C.J., Abrams, S.I., and Repasky, E.A. (2013). Baseline tumor growth and immune control in laboratory mice are significantly influenced by subthermoneutral housing temperature. *Proc. Natl. Acad. Sci. USA* 110, 20176–20181.
- Lichtenbelt, Wv., Kingma, B., van der Lans, A., and Schellen, L. (2014). Cold exposure—an approach to increasing energy expenditure in humans. *Trends Endocrinol. Metab.* 25, 165–167.
- Lusk, G. (1928). *The Elements of the Science of Nutrition* (Johnson Reprint Corporation).
- Maloney, S.K., Fuller, A., Mitchell, D., Gordon, C., and Overton, J.M. (2014). Translating animal model research: does it matter that our rodents are cold? *Physiology (Bethesda)* 29, 413–420.
- McConnell, W.J., and Yagloglou, C.P. (1925). Basal metabolism as affected by atmospheric conditions. *Arch. Intern. Med.* 36, 382–396.
- McKechnie, A.E., Gerson, A.R., McWhorter, T.J., Smith, E.K., Talbot, W.A., and Wolf, B.O. (2017). Avian thermoregulation in the heat: evaporative cooling in five Australian passerines reveals within-order biogeographic variation in heat tolerance. *J. Exp. Biol.* 220, 2436–2444.
- Meyer, C.W., Klingenspor, M., Rozman, J., and Heldmaier, G. (2004). Gene or size: metabolic rate and body temperature in obese growth hormone-deficient dwarf mice. *Obes. Res.* 12, 1509–1518.
- Moruppa, S.M. (1990). Energy expenditure and locomotor activity in mice selected for food intake adjusted for body weight. *Theor. Appl. Genet.* 79, 131–136.
- Mount, L.E. (1971). Metabolic rate and thermal insulation in albino and hairless mice. *J. Physiol.* 217, 315–326.

- Mount, L.E. (1973). The concept of thermal neutrality. In *Heat Loss from Animals and Man: Assessment and Control*, J.L. Monteith and L.E. Mount, eds. (Butterworths), pp. 425–439.
- Mount, L.E., and Willmott, J.V. (1967). The relation between spontaneous activity, metabolic rate and the 24 hour cycle in mice at different environmental temperatures. *J. Physiol.* *190*, 371–380.
- National Research Council (2011). *Guide for the Care and Use of Laboratory Animals* (The National Academies Press).
- Nedergaard, J., and Cannon, B. (2014). The browning of white adipose tissue: some burning issues. *Cell Metab.* *20*, 396–407.
- O'Connor, R.S., Wolf, B.O., Brigham, R.M., and McKechnie, A.E. (2017). Avian thermoregulation in the heat: efficient evaporative cooling in two southern African nightjars. *J. Comp. Physiol. B* *187*, 477–491.
- O'Neal, T.J., Friend, D.M., Guo, J., Hall, K.D., and Kravitz, A.V. (2017). Increases in Physical Activity Result in Diminishing Increments in Daily Energy Expenditure in Mice. *Curr. Biol.* *27*, 423–430.
- Oufara, S., Barré, H., Rouanet, J.L., and Chatonnet, J. (1987). Adaptation to extreme ambient temperatures in cold-acclimated gerbils and mice. *Am. J. Physiol.* *253*, R39–R45.
- Overton, J.M. (2010). Phenotyping small animals as models for the human metabolic syndrome: thermoneutrality matters. *Int. J. Obes.* *34*, S53–S58.
- Pan, Q., Li, M., Shi, Y.L., Liu, H., Speakman, J.R., and Wang, D.H. (2014). Lipidomics reveals mitochondrial membrane remodeling associated with acute thermoregulation in a rodent with a wide thermoneutral zone. *Lipids* *49*, 715–730.
- Pennycuik, P.R. (1967). A comparison of the effects of a variety of factors on the metabolic rate of the mouse. *Aust. J. Exp. Biol. Med. Sci.* *45*, 331–346.
- Périard, J.D., Racinais, S., and Sawka, M.N. (2015). Adaptations and mechanisms of human heat acclimation: Applications for competitive athletes and sports. *Scand. J. Med. Sci. Sports* *25*, 20–38.
- Perissin, L., Facchin, P., and Porro, C.A. (2000). Diurnal variations in tonic pain reactions in mice. *Life Sci.* *67*, 1477–1488.
- Pertwee, R.G., and Tavendale, R. (1977). Effects of delta9-tetrahydrocannabinol on the rates of oxygen consumption of mice. *Br. J. Pharmacol.* *60*, 559–568.
- Refinetti, R. (2010). The circadian rhythm of body temperature. *Front. Biosci.* *15*, 564–594.
- Reimúndez, A., Fernández-Peña, C., García, G., Fernández, R., Ordás, P., Gallego, R., Pardo-Vazquez, J.L., Arce, V., Viana, F., and Señarís, R. (2018). Deletion of the Cold Thermoreceptor TRPM8 Increases Heat Loss and Food Intake Leading to Reduced Body Temperature and Obesity in Mice. *J. Neurosci.* *38*, 3643–3656.
- Reitman, M.L. (2018). Of mice and men—environmental temperature, body temperature, and treatment of obesity. *FEBS Lett.* *592*, 2098–2107.
- Roberts, W.W., Mooney, R.D., and Martin, J.R. (1974). Thermoregulatory behaviors of laboratory rodents. *J. Comp. Physiol. Psychol.* *86*, 693–699.
- Romanovsky, A.A. (2018). The thermoregulation system and how it works. *Handb. Clin. Neurol.* *156*, 3–43.
- Romanovsky, A.A., Ivanov, A.I., and Shimansky, Y.P. (2002). Selected contribution: ambient temperature for experiments in rats: a new method for determining the zone of thermal neutrality. *J. Appl. Physiol.* *92*, 2667–2679.
- Rubner, M. (1902). *The Laws of Energy Consumption in Nutrition*. (Academic Press).
- Sándor, K., Helyes, Z., Elekes, K., and Szolcsányi, J. (2009). Involvement of capsaicin-sensitive afferents and the Transient Receptor Potential Vanilloid 1 Receptor in xylene-induced nocifensive behaviour and inflammation in the mouse. *Neurosci. Lett.* *451*, 204–207.
- Scholander, P.F., Hock, R., Walters, V., Johnson, F., and Irving, L. (1950). Heat regulation in some arctic and tropical mammals and birds. *Biol. Bull.* *99*, 237–258.
- Selman, C., Lumsden, S., Bünger, L., Hill, W.G., and Speakman, J.R. (2001). Resting metabolic rate and morphology in mice (*Mus musculus*) selected for high and low food intake. *J. Exp. Biol.* *204*, 777–784.
- Speakman, J.R. (2013). Measuring energy metabolism in the mouse - theoretical, practical, and analytical considerations. *Front. Physiol.* *4*, 34.
- Speakman, J.R., and Keijer, J. (2013). Not so nuanced: Reply to the comments of Gaskill and Garner on “Not so hot: Optimal housing temperatures for mice to mimic the environment of humans.”. *Mol. Metab.* *3*, 337.
- Speakman, J.R., and Rossi, F.P. (1999). No Support for Socio-Physiological Suppression Effect on Metabolism of Paired White Mice (*Mus sp.*). *Funct. Ecol.* *13*, 373–382.
- Szelényi, Z., Hummel, Z., Szolcsányi, J., and Davis, J.B. (2004). Daily body temperature rhythm and heat tolerance in TRPV1 knockout and capsaicin pre-treated mice. *Eur. J. Neurosci.* *19*, 1421–1424.
- Szymusiak, R., and Satinoff, E. (1981). Maximal REM sleep time defines a narrower thermoneutral zone than does minimal metabolic rate. *Physiol. Behav.* *26*, 687–690.
- Talbot, W.A., McWhorter, T.J., Gerson, A.R., McKechnie, A.E., and Wolf, B.O. (2017). Avian thermoregulation in the heat: evaporative cooling capacity of arid-zone Caprimulgiformes from two continents. *J. Exp. Biol.* *220*, 3488–3498.
- Tan, C.L., and Knight, Z.A. (2018). Regulation of Body Temperature by the Nervous System. *Neuron* *98*, 31–48.
- Tian, X.Y., Ganeshan, K., Hong, C., Nguyen, K.D., Qiu, Y., Kim, J., Tangirala, R.K., Tontonoz, P., and Chawla, A. (2016). Thermoneutral Housing Accelerates Metabolic Inflammation to Potentiate Atherosclerosis but Not Insulin Resistance. *Cell Metab.* *23*, 165–178.
- Trayhurn, P., and James, W.P. (1978). Thermoregulation and non-shivering thermogenesis in the genetically obese (*ob/ob*) mouse. *Pflugers Arch.* *373*, 189–193.
- Virtue, S., Even, P., and Vidal-Puig, A. (2012). Below thermoneutrality, changes in activity do not drive changes in total daily energy expenditure between groups of mice. *Cell Metab.* *16*, 665–671.
- Xiao, C., Goldgof, M., Gavrilova, O., and Reitman, M.L. (2015). Anti-obesity and metabolic efficacy of the  $\beta$ 3-adrenergic agonist, CL316243, in mice at thermoneutrality compared to 22°C. *Obesity (Silver Spring)* *23*, 1450–1459.
- Zhao, Z.J., Chi, Q.S., Liu, Q.S., Zheng, W.H., Liu, J.S., and Wang, D.H. (2014). The shift of thermoneutral zone in striped hamster acclimated to different temperatures. *PLoS One* *9*, e84396.
- Zygmunt, P.M., and Hogestatt, E.D. (2014). TRPA1. In *Mammalian Transient Receptor Potential (TRP) Cation Channels*, B. Nilius and V. Flockerzi, eds. (Springer), pp. 583–630.

## STAR★METHODS

## KEY RESOURCES TABLE

| REAGENT or RESOURCE                                                                             | SOURCE                                            | IDENTIFIER                                           |
|-------------------------------------------------------------------------------------------------|---------------------------------------------------|------------------------------------------------------|
| Chemicals, Peptides, and Recombinant Proteins                                                   |                                                   |                                                      |
| Resiniferatoxin                                                                                 | Tocris, Bristol, UK                               | Cat# 1137                                            |
| Capsaicin                                                                                       | Sigma, St. Louis, MO, USA                         | Cat# 360376                                          |
| Isoflurane (Forane)                                                                             | Baxter Healthcare Corporation, Deerfield, IL, USA | Cat# 10019-360-40                                    |
| Prevail (flunixin meglumine)                                                                    | VetOne, Boise, ID, USA                            | Cat# 502018                                          |
| Experimental Models: Organisms/Strains                                                          |                                                   |                                                      |
| C57BL/6J mice                                                                                   | Jackson Laboratories, Bar Harbor, ME, USA         | Cat# 000664                                          |
| <i>ob/ob</i> mice                                                                               | Jackson Laboratories, Bar Harbor, ME, USA         | Cat# 000632                                          |
| 129 mice                                                                                        | Jackson Laboratories, Bar Harbor, ME, USA         | Cat# 002448                                          |
| <i>Trpv1<sup>-/-</sup>; Trpm8<sup>-/-</sup>; Trpa1<sup>-/-</sup></i> triple knockout mice (TKO) | Dr. Alexander Chesler, NCCIH                      | (Bautista et al., 2006, 2007; Caterina et al., 2000) |
| Software and Algorithms                                                                         |                                                   |                                                      |
| SAS v 9.4                                                                                       | SAS Institute, Cary, NC, USA                      | N/A                                                  |
| Oxymax software v 5.52                                                                          | Columbus Instruments, Columbus, OH, USA           | N/A                                                  |
| VitalView v 5.0                                                                                 | Starr Life Sciences, Oakmont, PA, USA             | N/A                                                  |
| Graph pad v 8.1.0                                                                               | GraphPad Software, San Diego, CA, USA             | N/A                                                  |
| Other                                                                                           |                                                   |                                                      |
| CLAMS                                                                                           | Columbus Instruments, Columbus, OH, USA           | Sn# 110117                                           |
| CLAMS-HC                                                                                        | Columbus Instruments, Columbus, OH                | Sn# 190192                                           |
| HOB0 Temperature data logger                                                                    | Onset Computer Corporation, Bourne, MA, USA       | Cat# U12-012                                         |
| Mice cages                                                                                      | Tecniplast USA, West Chester, PA                  | Cat# 1284                                            |
| Body temperature telemetry system - Implants                                                    | Starr Life Sciences, Oakmont, PA, USA             | Cat# G2 E-Mitter                                     |
| Body temperature telemetry system - Energizer/receivers                                         | Starr Life Sciences, Oakmont, PA, USA             | Cat# ER4000                                          |
| Chow diet                                                                                       | Envigo Inc, Madison, WI, USA                      | Cat# NIH-07                                          |
| High fat diet                                                                                   | Research Diets, New Brunswick, NJ, USA            | Cat# D12492                                          |
| Paper bedding                                                                                   | Envigo, Indianapolis, IN, USA                     | Cat# 7099-TEK-fresh                                  |
| Sani-Chips bedding                                                                              | Envigo, Indianapolis, IN, USA                     | Cat# 7090 Teklad sani-chips                          |

## LEAD CONTACT AND MATERIALS AVAILABILITY

## Lead Contact

Further information and requests for resources should be directed to and will be fulfilled by the Lead Contact, Marc Reitman ([marc.reitman@nih.gov](mailto:marc.reitman@nih.gov)).

## Materials Availability

This study did not generate new unique reagents, mouse lines, or other material.

## Data Code Availability

The data and SAS code generated during this study are available for download at Open Science Framework: <https://osf.io/r5nfs/>.

## EXPERIMENTAL MODEL AND SUBJECT DETAILS

## Mice

Mice at 3-10 months of age were singly housed at 21-22°C with a 12:12-h dark:light cycle (lights on at 0600) in a clean, conventional facility with Teklad paper bedding (7099-TEK-fresh, Envigo, Indianapolis, IN) with water and chow (NIH-07 Envigo Inc, Madison, WI);

3.1 metabolizable kcal/g, food quotient 0.909) provided *ad libitum*. Experiments were approved by the NIDDK Institutional Animal Care and Use Committee (protocol K016-DEOB-17). Control (WT) mice were male C57BL/6J (#000664; Jackson Laboratories, Bar Harbor, ME). Leptin-deficient (#000632; Jackson Laboratories) *ob/ob* male and wild-type 129 (#002448) male and female mice were obtained from Jackson Laboratories (Bar Harbor, ME). Diet induced obese (DIO) C57BL/6J (#000664; Jackson Laboratories, Bar Harbor, ME) male mice were prepared by high fat diet (60 cal% from fat, D12492, Research Diets, New Brunswick, NJ; 5.24 metabolizable kcal/g, food quotient 0.793) feeding for 4 months starting at 8 weeks of age. Mice number, age, and body weight for each experiment are in [Table S1](#).

Treatment with resiniferatoxin (RTX; 20 mM in ethanol, diluted with saline; 50  $\mu$ l of 20, 40, then 80  $\mu$ M s.c. on 3 consecutive days, starting at 3-7 days of age), a potent TRPV1 agonist, was used to ablate neonatal TRPV1-positive neurons in C57BL/6J male mice. Successful ablation was confirmed by the lack of wiping movements after administration of 20  $\mu$ l of 0.1% capsaicin into the eye and by the lack of licking hind paws in a hot plate test ([Cavanaugh et al., 2011](#); [Sándor et al., 2009](#)).

*Trpv1<sup>-/-</sup>;Trpm8<sup>-/-</sup>;Trpa1<sup>-/-</sup>* triple knockout (TKO) male mice were provided by Dr. Alexander Chesler, NCCIH, bred from the single gene knockout mice ([Bautista et al., 2006, 2007](#); [Caterina et al., 2000](#)). TRPV1, TRPM8, and TRPA1, contribute to sensing hot, cool, and possibly cold, respectively. Mice with single deletions exhibit loss of Tb response to cognate ligands ([Tan and Knight, 2018](#)). However, their reported baseline Tb phenotype is subtle: increased Tb span in *Trpv1<sup>-/-</sup>* ([Szelényi et al., 2004](#)), slightly reduced Tb at cool Ta in *Trpm8<sup>-/-</sup>* ([Reimúndez et al., 2018](#)), and none described for *Trpa1<sup>-/-</sup>* mice ([Zygmunt and Hogestatt, 2014](#)).

C57BL/6J male mice were warm-acclimated (30°C for 10 days) versus controls kept at 22°C. While a longer acclimation time was not tested, human adaptation to heat stress is near complete by one week ([Périard et al., 2015](#)), one week produces major changes in mouse BAT ([Clayton and McCurdy, 2018](#)), and 6 months at 30°C versus 21°C versus 4°C revealed no differences in a Scholander analysis ([Fischer et al., 2016a](#)). Thus, the 10-day adaptation to 30°C probably produces maximal or near-maximal acclimation.

## METHOD DETAILS

### Indirect calorimetry systems

TEE, respiratory exchange ratio (RER), food intake (floor feeder), and physical activity (infrared beam break as total activity, 0.5 inch spacing) were measured with an indirect calorimetry system (CLAMS using Oxymax software v5.52, Columbus Instruments, Columbus, OH). Tb was measured simultaneously by telemetry using G2 E-Mitter transponders implanted intraperitoneally (Starr Life Sciences, Oakmont, PA). Whole body heat conductance was calculated as TEE/(Tb-Ta) ([Mount, 1971](#)). Mice were housed individually with *ad libitum* access to food and water in chambers without bedding or nesting material (2.5 L volume, flow rate 0.5 L/min, sampling flow 0.4 L/min, settle time 55 s, measure time 5 s, each chamber sampled every 13 min, giving 5 sampling cycles per 65 min interval). The food intake and physical activity were measured per 13 minute interval. All 12 calorimetry chambers were housed in a single temperature-controlled environmental chamber. Ta was continuously monitored (U12-012 data logger, Onset, Bourne, MA) in an empty calorimetry chamber.

A second, 'home cage', indirect calorimetry system was used when noted (CLAMS-HC using Oxymax v5.52, Columbus Instruments). In this system mice were housed individually with *ad libitum* access to food (hanging feeder) and water in Tecniplast 1284 cages with ~95 g of wood chip bedding (7090 Teklad sani-chips, Envigo, Indianapolis, IN) with measured physical activity (infrared beam break as total activity, 1 inch spacing) and continual monitoring of Ta in each cage. Calorimetry parameters are: 7.75 L volume, 0.9 L/min flow rate, 0.6 L/min sampling flow, 15 s settle time, 5 s measure time, with each chamber sampled every 260 s. Thus, the food intake and physical activity were measured per 260 s interval, giving 14 sampling cycles per 61 min interval ([Figures 3E and 3F](#)). The activity and food intake measurements are not directly comparable between the chamber and home cage indirect calorimetry systems.

Mice were acclimated to the chambers or cages for 3 days at 22°C (30°C acclimated mice were acclimated to chambers at 30°C) before each study.

### Ambient temperature changes setup

Previously, we studied mice for 24 h at each Ta ([Abreu-Vieira et al., 2015](#)). We compared that procedure (using Ta of 16, 22, 26, and 32°C) to a protocol where Ta was changed multiple times/day, similar to that used by [Fischer et al. \(2016a\)](#). In the current protocol, Ta was changed periodically during the light phase, using the data from the final 65 minutes (5 data points) of a given Ta, where it is plateauing. The TEE, Tb, and heat conductance determined from the two protocols agreed well ([Figure S1A](#)). The physical activity, food intake, and RER varied more and agreed less well between the methods. We concluded that the shorter protocol is suitable for further studies.

We evolved protocols with: i) measurements between 0900 and 1600, during light phase (1900 to 0400, during dark phase), to avoid altered physiology associated with phase change, ii) using multiple consecutive days in the chambers, with the overnight Ta = 25°C (30°C in case of 30°C acclimated mice), and iii) using a 2 h interval for Ta changes of 1°C, with longer interval times for larger Ta changes. Protocols for Ta changes setups are summarized in [Table S2](#) and an example of temperature changes measured in cage is in [Figure S1B](#).

For visual clarity the points in [Figures 1, 2, 3](#), and [S3](#) represents mean  $T_a$  and mean value of parameter from last 65 minutes before  $T_a$  change, whereas the regression analyses used data from the full intervals (all points from gray shaded areas in [Table S2](#); excluding only data where  $T_a$  changed steeply,  $> 2^\circ\text{C}/\text{h}$ ).

### Body temperature telemetry

G2 E-Mitter transponders (Starr Life Sciences, Oakmont, PA) were implanted intraperitoneally under isoflurane anesthesia (5% induction, 1.2% maintenance; Baxter Healthcare Corporation, Deerfield, IL) with Prevail (flunixin meglumine) analgesia (2.2 mg/kg sc at operation and daily for two days). Mice were studied at least one week after surgery.  $T_b$  was continuously measured by ER4000 energizer/receivers and 1 min means collected with VitalView software (Starr Life Sciences, Oakmont, PA), or by indirect calorimetry systems (Columbus Instruments, Columbus, OH)

### QUANTIFICATION AND STATISTICAL ANALYSIS

The thermal biology parameters were evaluated by segmented linear regression with  $T_a$  as the independent variable and individual mice as random effect. The dependent variable is either TEE,  $T_b$ , or heat conductance. In experiments with  $T_a < 34^\circ\text{C}$ , data were fit to two-segment models with four parameters: slope of line 1, breakpoint  $T_a$ , value for dependent variable at breakpoint, and slope of line 2. For TEE versus  $T_a$ , the slope of line 2 was fixed to zero and the breakpoint is where the TEE stops decreasing and plateaus (the  $T_{IC_{EE}}$ ). For heat conductance versus  $T_a$ , the slope of line 1 was fixed to zero and the breakpoint is where the heat conductance begins to increase (the  $T_{IC_{cond}}$ ). For  $T_b$  versus  $T_a$ , the slope of line 1 was fixed to zero and the breakpoint is where the  $T_b$  begins to increase (the  $T_{b_{inc}}$ ).

In light-phase experiments including higher  $T_a (> 34^\circ\text{C})$ , the data were fitted to three-segment models, with six parameters: slope of line 1, breakpoint 1  $T_a$ , value for dependent variable at breakpoint 1, slope of line 2, breakpoint 2  $T_a$ , and slope of line 3. For TEE versus  $T_a$ , the slope of line 2 was fixed to zero, breakpoint 1 is where the TEE stops decreasing and plateaus ( $T_{IC_{EE}}$ ), and breakpoint 2 is where the TEE starts increasing (the  $TEE\_R$ ). For  $T_b$  versus  $T_a$ , the slope of line 1 was fixed to zero, breakpoint 1 is where the  $T_b$  begins to increase ( $T_{b_{inc}}$ ), and breakpoint 2 is where the rate of  $T_b$  rise increases (the  $T_{b\_R}$ ).

For dark-phase experiments including  $T_a > 34^\circ\text{C}$ , the TEE data were fit to two-segment models with no slope restrictions. Only one TEE breakpoint (the  $TEE\_R$ ) was used because adding a second breakpoint did not improve the fit. For  $T_b$  versus  $T_a$ , the slope of line 1 was fixed to zero and the breakpoint is where  $T_b$  begins to increase (the  $T_{b\_R}$ ). The conductance parameters were not evaluated by segmented regression because the conductance versus  $T_a$  plot was curvilinear, without distinct linear portions.

The definded  $T_b$  was calculated as the intercept of TEE versus  $T_a$  in the first segment, where  $T_a < T_{IC_{EE}}$ . Statistical analyses were conducted using PROC NL MIXED (SAS version 9.4; SAS Institute, Cary, NC, USA). Data are presented as mean  $\pm$  SE. Statistical significance was declared at  $p < 0.05$ . See Supplementary Materials for further details.

**Cell Reports, Volume 31**

**Supplemental Information**

**Mouse Thermoregulation: Introducing  
the Concept of the Thermoneutral Point**

**Vojtěch Škop, Juen Guo, Naili Liu, Cuiying Xiao, Kevin D. Hall, Oksana Gavrilova, and Marc L. Reitman**

Table S1. Summary of experimental parameters. Key to abbreviations and parameters is on next page. Data are mean ± SEM. Related to Figures 1 - 4.

| Ta range of 16 - 34 °C                          | Control C57BL/6J<br>pooled from 4<br>experiments | Control C57BL/6J | RTX              | Control C57BL/6J | TKO              | Control C57BL/6J | ob/ob            | Control C57BL/6J | DIO              | 24h C57BL/6J<br>light | 24h C57BL/6J<br>dark |
|-------------------------------------------------|--------------------------------------------------|------------------|------------------|------------------|------------------|------------------|------------------|------------------|------------------|-----------------------|----------------------|
|                                                 | 1                                                | 2A               | 2A               | 2B               | 2B               | 2C               | 2C               | 2D               | 2D               | Abreu-Vieira 2015     | Abreu-Vieira 2015    |
| Figure reference                                | 1                                                | 2A               | 2A               | 2B               | 2B               | 2C               | 2C               | 2D               | 2D               | Abreu-Vieira 2015     | Abreu-Vieira 2015    |
| Phase                                           | Light                                            | Light            | Light            | Light            | Light            | Light            | Light            | Light            | Light            | Light                 | Dark                 |
| Ta setup protocol (Table S2)                    | 1                                                | 1                | 1                | 1                | 1                | 1                | 1                | 1                | 1                | -                     | -                    |
| n of mice                                       | 21                                               | 5                | 6                | 5                | 6                | 6                | 5                | 5                | 6                | 19                    | 19                   |
| n of data points in each regression             | 2320                                             | 325              | 390              | 575              | 690              | 690              | 575              | 650              | 741              | 8310                  | 8982                 |
| Body weight (g)                                 | 32.27 ± 0.97                                     | 38.02 ± 1.19     | 32.90 ± 0.48     | 30.92 ± 1.18     | 27.72 ± 0.95     | 32.77 ± 0.49     | 56.50 ± 2.02     | 30.58 ± 0.95     | 48.80 ± 0.74     | 26.92 ± 0.5           | 26.92 ± 0.5          |
| Age (wks)                                       | 15, 16, 39, 45                                   | 45               | 45               | 39               | 39               | 16               | 16               | 25               | 25               | 10 to 12              | 10 to 12             |
| Sex                                             | male                                             | male             | male             | male             | male             | male             | male             | male             | male             | male                  | male                 |
| Tl <sub>EE</sub> (°C)                           | 28.90 ± 0.15                                     | 28.87 ± 0.29     | 26.59 ± 0.48     | 28.57 ± 0.24     | 29.16 ± 0.25     | 27.11 ± 0.26     | 25.00 ± 0.34     | 28.58 ± 0.24     | 29.99 ± 0.20     | 29.03 ± 0.12          | 32.36 ± 0.17         |
| Tl <sub>cond</sub> (°C)                         | 28.78 ± 0.08                                     | 28.56 ± 0.23     | 25.77 ± 0.48     | 28.79 ± 0.18     | 28.83 ± 0.17     | 28.80 ± 0.14     | 27.04 ± 0.20     | 28.45 ± 0.13     | 29.21 ± 0.12     | 28.73 ± 0.17          | not defined          |
| Tb <sub>inc</sub> (°C)                          | 28.92 ± 0.11                                     | 27.58 ± 0.24     | not defined      | 28.75 ± 0.17     | 28.81 ± 0.18     | 28.99 ± 0.16     | 25.61 ± 0.19     | 29.22 ± 0.15     | 29.55 ± 0.13     | 27.49 ± 0.38          | not seen             |
| Tb <sub>inc</sub> - Tl <sub>EE</sub> (°C)       | 0.02                                             | -1.29            | -                | 0.18             | -0.35            | 1.88             | 0.61             | 0.64             | -0.44            | -1.53                 | -                    |
| TEE, at Tl <sub>EE</sub> (kcal/h)               | 0.246 ± 0.006                                    | 0.245 ± 0.013    | 0.330 ± 0.010    | 0.239 ± 0.010    | 0.227 ± 0.007    | 0.272 ± 0.005    | 0.388 ± 0.009    | 0.235 ± 0.006    | 0.280 ± 0.009    | 0.235 ± 0.006         | 0.265 ± 0.006        |
| Cond, <Tl <sub>cond</sub> (kcal/h/Δ°C)          | 0.0328 ± 0.0006                                  | 0.0349 ± 0.0014  | 0.0351 ± 0.0012  | 0.0315 ± 0.0019  | 0.0314 ± 0.0009  | 0.0339 ± 0.0007  | 0.0430 ± 0.0020  | 0.0319 ± 0.0008  | 0.0410 ± 0.0011  | 0.0310 ± 0.0006       | -                    |
| Tb, < Tb <sub>inc</sub> (°C)                    | 35.60 ± 0.07                                     | 35.44 ± 0.09     | varies           | 35.66 ± 0.12     | 35.70 ± 0.16     | 35.49 ± 0.09     | 33.91 ± 0.07     | 35.45 ± 0.06     | 35.87 ± 0.08     | 35.80 ± 0.11          | 36.89 ± 0.13         |
| defended Tb (°C)                                | 37.80 ± 0.36                                     | 36.77 ± 0.65     | 38.67 ± 1.32     | 37.12 ± 0.53     | 37.51 ± 0.47     | 35.39 ± 0.52     | 35.28 ± 1.13     | 36.83 ± 0.47     | 38.36 ± 0.37     | 38.26 ± 0.29          | 43.04 ± 0.32         |
| defended Tb - Tb, < Tb <sub>inc</sub> (°C)      | 2.20                                             | 1.33             | -                | 1.46             | 1.81             | -0.09            | 1.37             | 1.38             | 2.49             | 2.45                  | 6.15                 |
| TEE Slope, <Tl <sub>cond</sub> (kcal/h/°C)      | -0.0277 ± 0.0007                                 | -0.0310 ± 0.0011 | -0.0273 ± 0.0020 | -0.0279 ± 0.0008 | -0.0272 ± 0.0008 | -0.0328 ± 0.0012 | -0.0378 ± 0.0030 | -0.0285 ± 0.0008 | -0.0335 ± 0.0007 | -0.0255 ± 0.0004      | -0.0248 ± 0.0003     |
| Cond Slope, >Tl <sub>cond</sub> (kcal/h/Δ°C/°C) | 0.0070 ± 0.0005                                  | 0.0054 ± 0.0003  | 0.0032 ± 0.0002  | 0.0061 ± 0.0004  | 0.0056 ± 0.0003  | 0.0079 ± 0.0003  | 0.0072 ± 0.0003  | 0.0069 ± 0.0003  | 0.0077 ± 0.0003  | 0.0073 ± 0.0004       | -                    |
| Tb Slope, >Tb <sub>inc</sub> (°C Tb/°C)         | 0.337 ± 0.029                                    | 0.274 ± 0.015    | 0.488 ± 0.017    | 0.368 ± 0.021    | 0.319 ± 0.020    | 0.390 ± 0.019    | 0.557 ± 0.017    | 0.287 ± 0.016    | 0.333 ± 0.016    | 0.145 ± 0.014         | -                    |

| Ta range of 16 - 38 °C                                  | Control C57BL/6J<br>pooled from 3<br>experiments | Control C57BL/6J | C57BL/6J<br>30 °C acclimated | Control C57BL/6J | 129 male         | 129 male         | 129 female       | C57BL/6J dark<br>phase pooled<br>from 2 expts | Control C57BL/6J | Control C57BL/6J<br>home cages | Control C57BL/6J<br>Dark | Control C57BL/6J<br>home<br>cages, dark |
|---------------------------------------------------------|--------------------------------------------------|------------------|------------------------------|------------------|------------------|------------------|------------------|-----------------------------------------------|------------------|--------------------------------|--------------------------|-----------------------------------------|
|                                                         | 3D, 4B, S3                                       | 3A               | 3A                           | 3B               | 3B               | 3C               | 3C               | 3D, 4C                                        | 3E               | 3E                             | 3F                       | 3F                                      |
| Figure reference                                        | 3D, 4B, S3                                       | 3A               | 3A                           | 3B               | 3B               | 3C               | 3C               | 3D, 4C                                        | 3E               | 3E                             | 3F                       | 3F                                      |
| Phase                                                   | Light                                            | Light            | Light                        | Light            | Light            | Light            | Light            | Dark                                          | Light            | Light                          | Dark                     | Dark                                    |
| Ta setup protocol (Table S2)                            | 2                                                | 2                | 3                            | 2                | 2                | 2                | 2                | 4                                             | 2                | 2                              | 4                        | 4                                       |
| n of mice                                               | 15                                               | 5                | 5                            | 5                | 6                | 7                | 4                | 17                                            | 6                | 11                             | 6                        | 11                                      |
| n of data points in each regression                     | 2175                                             | 585              | 725                          | 705              | 846              | 1001             | 572              | 2636                                          | 809              | 4213                           | 881                      | 4114                                    |
| Body weight (g)                                         | 30.13 ± 0.53                                     | 29.78 ± 1.37     | 31.32 ± 1.44                 | 30.02 ± 0.33     | 31.82 ± 1.16     | 27.14 ± 0.60     | 21.05 ± 0.50     | 33.42 ± 1.02                                  | 28.62 ± 0.71     | 31.18 ± 0.62                   | 28.35 ± 0.75             | 32.08 ± 0.71                            |
| Age (wks)                                               | 25, 27, 33                                       | 33               | 28                           | 27               | 26               | 14               | 14               | 10, 46                                        | 12               | 15                             | 10                       | 18                                      |
| Sex                                                     | male                                             | male             | male                         | male             | male             | male             | female           | male                                          | male             | male                           | male                     | male                                    |
| Tl <sub>EE</sub> (°C)                                   | 28.83 ± 0.12                                     | 28.92 ± 0.19     | 28.60 ± 0.01                 | 28.77 ± 0.23     | 29.29 ± 0.22     | 28.80 ± 0.20     | 29.90 ± 0.20     | same as TEE_R                                 | 30.44 ± 0.25     | 30.92 ± 0.12                   | same as TEE_R            | same as TEE_R                           |
| Tl <sub>cond</sub> (°C)                                 | 28.30 ± 0.10                                     | 28.70 ± 0.21     | 28.19 ± 0.22                 | 28.75 ± 0.16     | 29.16 ± 0.15     | 29.16 ± 0.14     | 28.89 ± 0.38     | not defined                                   | 27.36 ± 0.41     | 27.58 ± 0.14                   | not defined              | not defined                             |
| Tb <sub>inc</sub> (°C)                                  | 28.76 ± 0.13                                     | 28.74 ± 0.33     | 27.69 ± 0.19                 | 27.23 ± 0.33     | 29.35 ± 0.18     | 30.43 ± 0.01     | 30.11 ± 0.04     | same as Tb_R                                  | 28.19 ± 0.02     | 27.77 ± 0.45                   | same as Tb_R             | same as Tb_R                            |
| Tb <sub>inc</sub> - Tl <sub>EE</sub> (°C)               | -0.07                                            | -0.18            | -0.91                        | -1.54            | 0.06             | 1.63             | 0.21             | -1.17                                         | -2.25            | -3.15                          | -1.22                    | -0.09                                   |
| TEE, at Tl <sub>EE</sub> (kcal/h)                       | 0.234 ± 0.004                                    | 0.221 ± 0.004    | 0.230 ± 0.008                | 0.246 ± 0.007    | 0.253 ± 0.006    | 0.181 ± 0.006    | 0.185 ± 0.008    | 0.286 ± 0.008                                 | 0.226 ± 0.005    | 0.226 ± 0.007                  | 0.257 ± 0.010            | 0.267 ± 0.007                           |
| Cond, <Tl <sub>cond</sub> (kcal/h/Δ°C)                  | 0.0326 ± 0.0004                                  | 0.0335 ± 0.0012  | 0.0310 ± 0.0022              | 0.0327 ± 0.0016  | 0.0350 ± 0.0014  | 0.0232 ± 0.0012  | 0.0273 ± 0.0011  | -                                             | 0.0335 ± 0.0027  | 0.0340 ± 0.0020                | -                        | -                                       |
| Tb, < Tb <sub>inc</sub> (°C)                            | 35.40 ± 0.06                                     | 35.27 ± 0.08     | 35.15 ± 0.08                 | 35.46 ± 0.10     | 35.83 ± 0.10     | 36.09 ± 0.12     | 36.31 ± 0.17     | 36.52 ± 0.06                                  | 35.35 ± 0.10     | 35.31 ± 0.06                   | 36.51 ± 0.14             | 36.35 ± 0.06                            |
| defended Tb (°C)                                        | 37.21 ± 0.34                                     | 36.20 ± 0.47     | 37.86 ± 0.41                 | 38.11 ± 0.49     | 37.81 ± 0.43     | 37.62 ± 0.47     | 37.23 ± 0.43     | 45.40 ± 0.39                                  | 39.50 ± 0.42     | 39.76 ± 0.31                   | 44.72 ± 0.51             | 44.50 ± 0.34                            |
| defended Tb - Tb, < Tb <sub>inc</sub> (°C)              | 1.81                                             | 0.93             | 2.95                         | 2.65             | 1.97             | 1.53             | 0.92             | 8.88                                          | 4.15             | 4.44                           | 8.21                     | 8.15                                    |
| TEE Slope, <Tl <sub>cond</sub> (kcal/h/°C)              | -0.0279 ± 0.0008                                 | -0.0304 ± 0.0013 | -0.0248 ± 0.0006             | -0.0264 ± 0.0008 | -0.0297 ± 0.0008 | -0.0205 ± 0.0005 | -0.0252 ± 0.0006 | -0.0249 ± 0.0004                              | -0.0250 ± 0.0006 | -0.0256 ± 0.0003               | -0.0246 ± 0.0005         | -0.0248 ± 0.0003                        |
| Cond Slope, >Tl <sub>cond</sub> <Cond_R (kcal/h/Δ°C/°C) | 0.0063 ± 0.0004                                  | 0.0063 ± 0.0004  | 0.0061 ± 0.0003              | 0.0086 ± 0.0004  | 0.0074 ± 0.0003  | 0.0057 ± 0.0002  | 0.0039 ± 0.0006  | -                                             | 0.0048 ± 0.0006  | 0.0069 ± 0.0003                | -                        | -                                       |
| Tb Slope, >Tb <sub>inc</sub> <Tb_R (°C Tb/°C)           | 0.237 ± 0.025                                    | 0.256 ± 0.030    | 0.272 ± 0.021                | 0.154 ± 0.013    | 0.300 ± 0.024    | 0.335 ± 0.017    | 0.265 ± 0.026    | -                                             | 0.130 ± 0.010    | 0.068 ± 0.008                  | -                        | -                                       |
| TEE_R (°C)                                              | 33.91 ± 0.29                                     | 33.78 ± 0.37     | 35.24 ± 0.39                 | 34.38 ± 0.84     | 33.33 ± 0.04     | not seen         | not seen         | 33.94 ± 0.14                                  | 33.65 ± 0.85     | 34.50 ± 0.20                   | 34.28 ± 0.22             | 33.74 ± 0.12                            |
| Cond_R (°C)                                             | 32.95 ± 0.10                                     | 33.47 ± 0.24     | 35.83 ± 0.11                 | 33.51 ± 0.02     | not seen         | not seen         | 32.80 ± 0.42     | not defined                                   | 31.94 ± 0.17     | 32.43 ± 0.08                   | not defined              | not defined                             |
| Tb_R (°C)                                               | 33.15 ± 0.08                                     | 32.85 ± 0.16     | 33.31 ± 0.15                 | 33.26 ± 0.11     | 33.19 ± 0.13     | 33.15 ± 0.14     | 32.88 ± 0.02     | 32.77 ± 0.13                                  | 33.44 ± 0.12     | 33.36 ± 0.05                   | 33.06 ± 0.35             | 33.65 ± 0.04                            |
| TEE Slope, >TEE_R (kcal/h/°C)                           | 0.0158 ± 0.0041                                  | 0.0275 ± 0.0058  | 0.0181 ± 0.0037              | 0.0112 ± 0.0071  | 0.0125 ± 0.0028  | -                | -                | 0.0215 ± 0.0032                               | 0.0125 ± 0.0044  | 0.0212 ± 0.0016                | 0.0252 ± 0.0065          | 0.0143 ± 0.0017                         |
| Cond Slope, >Cond_R (kcal/h/Δ°C/°C)                     | 0.0134 ± 0.0011                                  | 0.0131 ± 0.0007  | 0.0296 ± 0.0014              | 0.0125 ± 0.0006  | -                | -                | 0.0081 ± 0.0006  | -                                             | 0.0190 ± 0.0005  | 0.0214 ± 0.0002                | -                        | -                                       |
| Tb Slope, >Tb_R (°C Tb/°C)                              | 0.780 ± 0.035                                    | 0.841 ± 0.033    | 0.728 ± 0.049                | 0.800 ± 0.029    | 0.891 ± 0.027    | 0.805 ± 0.025    | 0.576 ± 0.033    | 0.620 ± 0.030                                 | 0.784 ± 0.028    | 0.841 ± 0.010                  | 0.558 ± 0.083            | 0.800 ± 0.011                           |



**Table S1 continued: Key to abbreviations and parameters**

|                                                      |                                                                                                         |
|------------------------------------------------------|---------------------------------------------------------------------------------------------------------|
| <b>DIO</b>                                           | diet induced obese                                                                                      |
| <b>ob/ob</b>                                         | leptin-deficient                                                                                        |
| <b>RTX</b>                                           | neonatal treatment with resiniferatoxin                                                                 |
| <b>TKO</b>                                           | <i>Trpv1</i> <sup>-/-</sup> ; <i>Trpm8</i> <sup>-/-</sup> ; <i>Trpa1</i> <sup>-/-</sup> triple knockout |
|                                                      |                                                                                                         |
| <b>Tlc<sub>EE</sub></b>                              | lower critical temperature, the (first) breakpoint of the TEE vs Ta graph                               |
| <b>Tlc<sub>cond</sub></b>                            | lower critical temperature, the (first) breakpoint of the conductance vs Ta graph                       |
| <b>Tb<sub>inc</sub></b>                              | Ta above which the Tb first increases                                                                   |
| <b>Tb<sub>inc</sub> - Tlc<sub>EE</sub></b>           | difference between the Tb <sub>inc</sub> and Tlc <sub>EE</sub>                                          |
| <b>TEE at Tlc<sub>EE</sub></b>                       | mean TEE at Ta = Tlc <sub>EE</sub>                                                                      |
| <b>Cond, &lt;Tlc</b>                                 | mean conductance at Ta < Tlc <sub>cond</sub>                                                            |
| <b>Tb, &lt;Tb<sub>inc</sub></b>                      | mean Tb at Ta < Tb <sub>inc</sub>                                                                       |
| <b>defended Tb</b>                                   | X intercept of TEE vs Ta line (using only Ta < Tlc <sub>EE</sub> )                                      |
| <b>defended Tb - Tb, &lt;Tb<sub>inc</sub></b>        | defended Tb minus the measured Tb < Tb <sub>inc</sub>                                                   |
| <b>TEE Slope, &lt;Tlc<sub>EE</sub></b>               | TEE vs Ta slope for Ta < Tlc <sub>EE</sub>                                                              |
| <b>Cond Slope, &gt;Tlc<sub>cond</sub> &lt;Cond_R</b> | conductance slope in the region > Tlc <sub>cond</sub> and < Cond_R                                      |
| <b>Tb Slope, &gt;Tb<sub>inc</sub> &lt;Tb_R</b>       | Tb slope in the region > Tb <sub>inc</sub> and < Tb_R                                                   |
| <b>TEE_R</b>                                         | breakpoint of the TEE vs Ta graph, where TEE starts to rise with Ta                                     |
| <b>Cond_R</b>                                        | second breakpoint of the conductance vs Ta graph                                                        |
| <b>Tb_R</b>                                          | breakpoint of the Tb vs Ta graph, where Tb starts to steeply rise with Ta                               |
| <b>TEE Slope, &gt;TEE_R</b>                          | TEE vs Ta slope for Ta > TEE_R                                                                          |
| <b>Cond Slope, &gt;Cond_R</b>                        | conductance vs Ta slope for Ta > Cond_R                                                                 |
| <b>Tb Slope, &gt;Tb_R</b>                            | Tb vs Ta slope for Ta > Tb_R                                                                            |

**Table S2. Ta setup protocols. Related to STAR methods.**

Experimental outline showing Ta changes setup in calorimetry systems used for data acquisition. Data from gray-shaded areas were used for regression analysis.

|                                                   |       | Day time (h) | 16 - 8          | 8 - 9 | 9 - 10          | 10 - 11 | 11 - 12         | 12 - 13         | 13 - 14         | 14 - 15         | 15 - 16                  |       |                         |
|---------------------------------------------------|-------|--------------|-----------------|-------|-----------------|---------|-----------------|-----------------|-----------------|-----------------|--------------------------|-------|-------------------------|
| <b>Protocol number 1</b><br>Ta range 16 - 34 °C   | Day 1 | 22 °C        | 22 °C           | 22 °C | 19 °C           | 19 °C   | 19 °C           | 16 °C           | 16 °C           | 16 °C           | change to 25 °C at 16:00 |       |                         |
|                                                   | Day 2 | 25 °C        | 25 °C           | 25 °C | 27 °C           | 27 °C   | 28 °C           | 28 °C           | 29 °C           | 29 °C           |                          |       |                         |
|                                                   | Day 3 | 25 °C        | 30 °C           | 30 °C | 30 °C           | 30 °C   | 31 °C           | 31 °C           | 32 °C           | 32 °C           |                          |       |                         |
|                                                   | Day 4 | 25 °C        | 33 °C           | 33 °C | 33 °C           | 33 °C   | 34 °C           | 34 °C           | 35 °C           | 35 °C           |                          |       |                         |
|                                                   |       |              |                 |       | change at 10:00 |         |                 | change at 13:00 |                 |                 |                          |       |                         |
|                                                   |       |              |                 |       | change at 10:00 |         |                 | change at 12:00 |                 | change at 14:00 |                          |       |                         |
|                                                   |       |              | change at 8:00  |       |                 |         |                 | change at 12:00 |                 | change at 14:00 |                          |       |                         |
|                                                   |       |              | change at 8:00  |       |                 |         |                 | change at 12:00 |                 | change at 14:00 |                          |       |                         |
| <b>Protocol number 2</b><br>Ta range 16 - 38 °C   | Day 1 | 22 °C        | 22 °C           | 22 °C | 19 °C           | 19 °C   | 19 °C           | 16 °C           | 16 °C           | 16 °C           | change to 25 °C at 16:00 |       |                         |
|                                                   | Day 2 | 25 °C        | 25 °C           | 25 °C | 27 °C           | 27 °C   | 28 °C           | 28 °C           | 29 °C           | 29 °C           |                          |       |                         |
|                                                   | Day 3 | 25 °C        | 30 °C           | 30 °C | 30 °C           | 30 °C   | 31 °C           | 31 °C           | 32 °C           | 32 °C           |                          |       |                         |
|                                                   | Day 4 | 25 °C        | 33 °C           | 33 °C | 33 °C           | 33 °C   | 34 °C           | 34 °C           | 35 °C           | 35 °C           |                          |       |                         |
|                                                   | Day 5 | 25 °C        | 36 °C           | 36 °C | 36 °C           | 36 °C   | 37 °C           | 37 °C           | 38 °C           | 38 °C           |                          |       |                         |
|                                                   |       |              |                 |       | change at 10:00 |         |                 | change at 13:00 |                 |                 |                          |       |                         |
|                                                   |       |              |                 |       | change at 10:00 |         |                 | change at 12:00 |                 | change at 14:00 |                          |       |                         |
|                                                   |       |              | change at 8:00  |       |                 |         |                 | change at 12:00 |                 | change at 14:00 |                          |       |                         |
|                                                   |       |              | change at 8:00  |       |                 |         |                 | change at 12:00 |                 | change at 14:00 |                          |       |                         |
|                                                   |       |              | change at 8:00  |       |                 |         |                 | change at 12:00 |                 | change at 14:00 |                          |       |                         |
| <b>Protocol number 3</b><br>30 °C acclimated mice | Day 1 | 30 °C        | 30 °C           | 30 °C | 31 °C           | 31 °C   | 32 °C           | 32 °C           | 33 °C           | 33 °C           | change to 30 °C at 16:00 |       |                         |
|                                                   | Day 2 | 30 °C        | 34 °C           | 34 °C | 34 °C           | 34 °C   | 35 °C           | 35 °C           | 36 °C           | 36 °C           |                          |       |                         |
|                                                   | Day 3 | 30 °C        | 37 °C           | 37 °C | 37 °C           | 37 °C   | 38 °C           | 38 °C           | 40 °C           | 40 °C           |                          |       |                         |
|                                                   | Day 4 | 30 °C        | 29 °C           | 29 °C | 28 °C           | 28 °C   | 27 °C           | 27 °C           | 25 °C           | 25 °C           |                          |       |                         |
|                                                   | Day 5 | 30 °C        | 22 °C           | 22 °C | 22 °C           | 22 °C   | 19 °C           | 19 °C           | 19 °C           | 19 °C           |                          |       |                         |
|                                                   |       |              |                 |       | change at 10:00 |         | change at 12:00 |                 | change at 14:00 |                 |                          |       |                         |
|                                                   |       |              | change at 8:00  |       |                 |         | change at 12:00 |                 | change at 14:00 |                 |                          |       |                         |
|                                                   |       |              | change at 8:00  |       |                 |         | change at 12:00 |                 | change at 14:00 |                 |                          |       |                         |
|                                                   |       |              | change at 8:00  |       | change at 10:00 |         | change at 12:00 |                 | change at 14:00 |                 |                          |       |                         |
|                                                   |       |              |                 |       |                 |         | change at 12:00 |                 | change at 14:00 |                 |                          |       |                         |
| <b>Protocol number 4</b><br>Dark phase            | Day 1 | 22 °C        | 22 °C           | 22 °C | 22 °C           | 22 °C   | 19 °C           | 19 °C           | 19 °C           | 16 °C           | 16 °C                    | 16 °C | change to 25 °C at 4:00 |
|                                                   | Day 2 | 25 °C        | 25 °C           | 25 °C | 27 °C           | 27 °C   | 28 °C           | 28 °C           | 29 °C           | 29 °C           | 30 °C                    | 30 °C |                         |
|                                                   | Day 3 | 25 °C        | 31 °C           | 31 °C | 31 °C           | 31 °C   | 32 °C           | 32 °C           | 33 °C           | 33 °C           | 34 °C                    | 34 °C |                         |
|                                                   | Day 4 | 25 °C        | 35 °C           | 35 °C | 35 °C           | 35 °C   | 36 °C           | 36 °C           | 37 °C           | 37 °C           | 38 °C                    | 38 °C |                         |
|                                                   |       |              |                 |       |                 |         | change at 22:00 |                 | change at 1:00  |                 |                          |       |                         |
|                                                   |       |              |                 |       | change at 20:00 |         | change at 22:00 |                 | change at 00:00 |                 | change at 2:00           |       |                         |
|                                                   |       |              | change at 18:00 |       |                 |         | change at 22:00 |                 | change at 00:00 |                 | change at 2:00           |       |                         |
|                                                   |       |              | change at 18:00 |       |                 |         | change at 22:00 |                 | change at 00:00 |                 | change at 2:00           |       |                         |

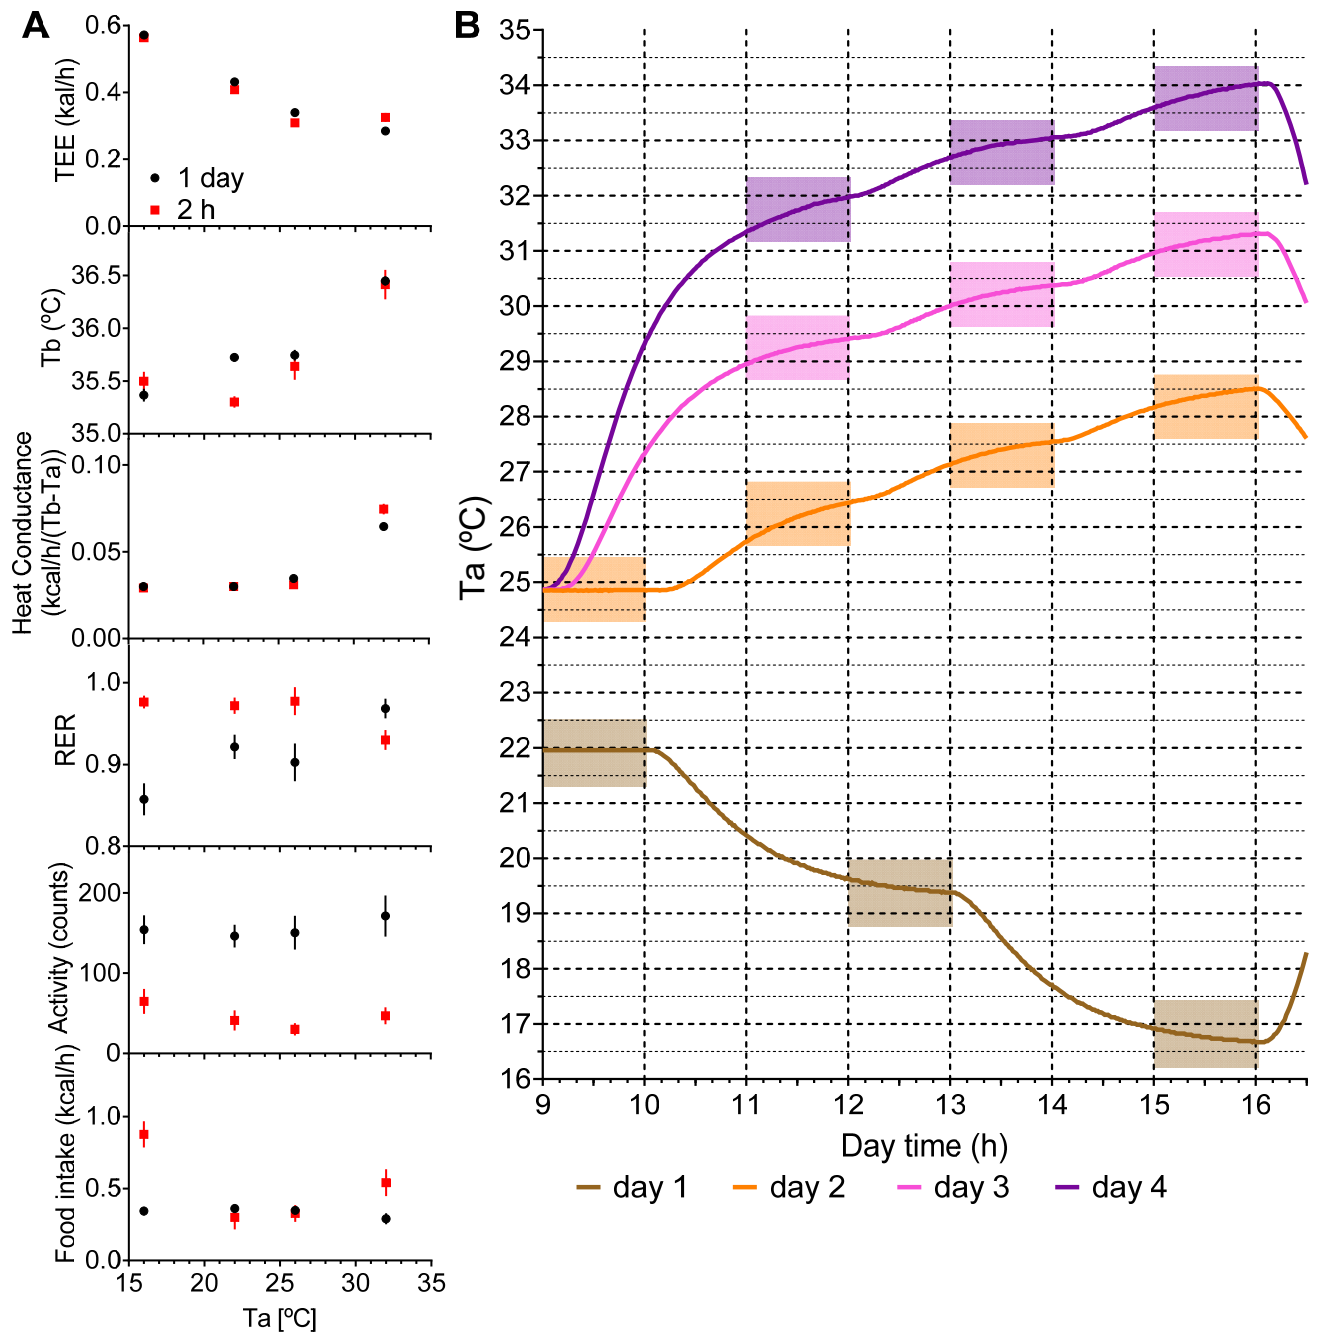

**Figure S1.** Measuring thermal biology parameters. Related to Figures 1 – 3 and STAR methods. (A) TEE, Tb, heat conductance, RER, activity, and food intake in mice using 65-min intervals (red squares) and the same mice housed 24 h (black circles) at the indicated Ta. In the 24 h dataset, only light phase data from 1 h after lights on to 1 h before lights off were used. Data are mean  $\pm$  SEM,  $n = 11$ . (B) Experimental outline showing environmental chamber Ta (showing Ta setup protocol 1 from Table S2). Shaded areas are the 65-min intervals used for the points in Figures 1, 2, 3, and S3. Regression analyses used all data from days 1, 2 (0900 – 1600) and days 3, 4 (1100 – 1600).

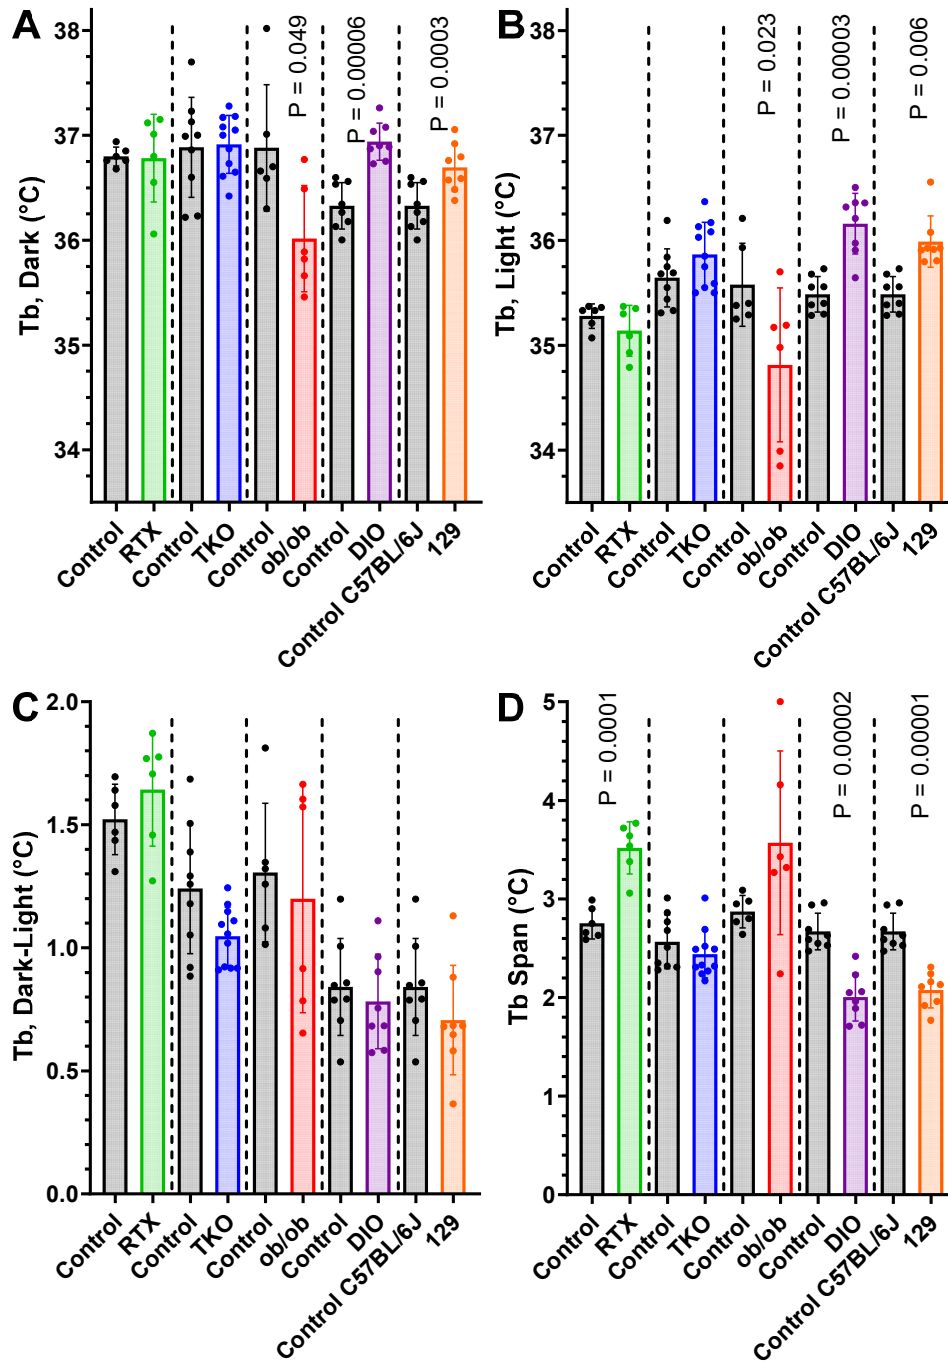

**Figure S2.** Baseline body temperature (Tb). Related to Figures 2, 3. Tb was measured continuously at an ambient temperature (Ta) of 22 °C by telemetry in singly-housed mice in their home cages for 72 consecutive hours. (A) Dark phase Tb. (B) Light phase Tb. (C) Difference between dark and light phase Tb. (D) Tb span, the difference between 5<sup>th</sup> and 95<sup>th</sup> percentiles of the full dataset. Experiments done at different times are separated by dashed lines. Data are mean  $\pm$ SD,  $n=6-11$ /group,  $P$  values are t-test vs controls studied simultaneously.

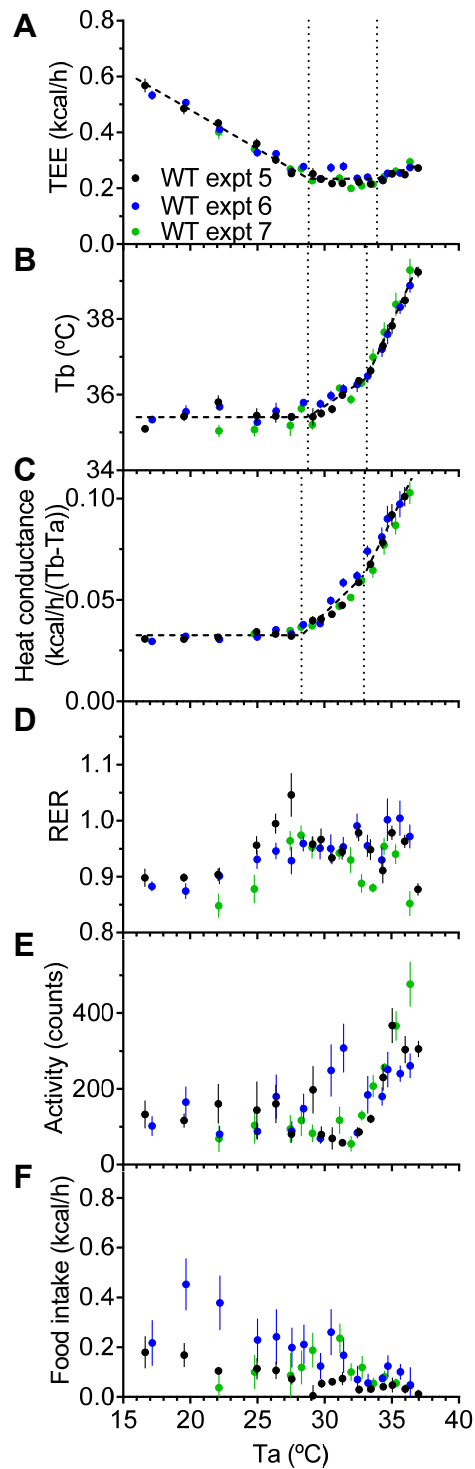

**Figure S3.** Energy metabolism and thermal physiology at high ambient temperatures ( $T_a$ ). Related to Figures 3, 4. Male C57BL/6J mice were studied in three independent experiments during light phase, with measurement of (A) total energy expenditure (TEE), (B) body temperature ( $T_b$ ), (C) heat conductance, (D) respiratory exchange ratio (RER), (E) physical activity, and (F) food intake. Lines and breakpoints (indicated by vertical lines) were calculated by mixed model regression analysis. For visual clarity, only  $T_a$  plateau mean  $\pm$  SEM data points are depicted (each from 65 min, 5 sampling cycles). See Table S1 for regression parameters and  $n$ .
